# Supplementary material for: Genetic architecture distinguishes systemic juvenile idiopathic arthritis from other forms of juvenile idiopathic arthritis: clinical and therapeutic implications
Source: PubMed Central journal article supplement — Ann Rheum Dis. 2016 Dec 7;76(5):906–13. doi: 10.1136/annrheumdis-2016-210324 (PMC5530341; doi:10.1136/annrheumdis-2016-210324), 2016-12-07
Supplement: annrheumdis-2016-210324supp002.pdf [file annrheumdis-2016-210324supp002.pdf]

## SUPPLEMENTARY MATERIAL

### Genetic Architecture Distinguishes Systemic Juvenile Idiopathic Arthritis from Other Forms of Juvenile Idiopathic Arthritis: Clinical and Therapeutic Implications

Michael J. Ombrello, Victoria L. Arthur, Elaine F. Remmers, Anne Hinks, Ioanna Tachmazidou, Alexei Grom, Dirk Foell, Alberto Martini, Marco Gattorno, Seza Özen, Sampath Prahalad, Andrew S. Zeff, John F. Bohnsack, Norman T. Ilowite, Elizabeth D. Mellins, Ricardo Russo, Claudio Len, Maria Odete E. Hilario, Sheila Oliveira, Rae S. M. Yeung, Alan Rosenberg, Lucy R. Wedderburn, Jordi Anton, Johannes-Peter Haas, Angela Rosen-Wolff, Kirsten Minden, Klaus Tenbrock, Erkan Demirkaya, Joanna Cobb, Elizabeth Baskin, Sara Signa, Emily Shuldiner, Richard H. Duerr, Jean-Paul Achkar, M. Ilyas Kamboh, Kenneth M. Kaufman, Leah C. Kottyan, Dalila Pinto, Stephen W. Scherer, Marta E. Alarcón-Riquelme, Elisa Docampo, Xavier Estivill, Ahmet Gül, British Society of Pediatric and Adolescent Rheumatology (BSPAR) Study Group, Inception Cohort of Newly Diagnosed Patients with Juvenile Idiopathic Arthritis (ICON-JIA), Childhood Arthritis Prospective Study (CAPS) Group, Randomized Placebo Phase Study of Rilonacept in sJIA (RAPPORT) Investigators, Sparks-Childhood Arthritis Response to Medication Study (CHARMS) Group, Biologically Based Outcome Predictors in JIA (BBOP) Group, Carl D. Langefeld, Susan Thompson, Eleftheria Zeggini, Daniel L. Kastner, Patricia Woo, and Wendy Thomson

#### FULL ALPHABETICAL MEMBERSHIP LISTING OF COLLABORATING GROUPS

##### British Society of Pediatric and Adolescent Rheumatology (BSPAR) Study Group:

Mario Abinum<sup>1</sup>, A. Bell<sup>2</sup>, Alan W. Craft<sup>3</sup>, Esther Crawley<sup>4</sup>, Joel David<sup>5</sup>, Helen Foster<sup>4</sup>, Janet Gardener-Medwin<sup>6</sup>, Jane Griffin<sup>7</sup>, Ann Hall<sup>8</sup>, M. Hall<sup>9</sup>, Ariane L. Herrick<sup>10</sup>, Peter Hollingworth<sup>11</sup>, Lennox Holt<sup>12</sup>, Stan Jones<sup>13</sup>, Gillian Pountain<sup>14</sup>, Clive Ryder<sup>15</sup>, Tauny Southwood<sup>15</sup>, I. Stewart<sup>13</sup>, Helen Venning<sup>16</sup>, Lucy R. Wedderburn<sup>17</sup>, Patricia Woo<sup>4</sup>, Sue Wyatt<sup>18</sup>

<sup>1</sup>Department of Immunodeficiency and Paediatric Rheumatology, Newcastle University, Newcastle, U.K.; <sup>2</sup>Queens University, Belfast, U.K.; <sup>3</sup>Royal Victoria Infirmary, Newcastle, U.K.; <sup>4</sup>Division of Infection and Immunity, University College London, London, U.K.; <sup>5</sup>Department of Rheumatology, Nuffield Orthopaedic Hospital, Oxford, U.K.; <sup>6</sup>The Royal Hospital for Sick Children, Yorkhill Children's Hospital, Glasgow, U.K.; <sup>7</sup>Chase Farm Hospital, London, U.K.; <sup>8</sup>Department of Rheumatology, Wexham Park Hospital, Berkshire, U.K.; <sup>9</sup>Department of Rheumatology, Cardiff Royal Infirmary, Cardiff, U.K.; <sup>10</sup>University of Manchester, Manchester Academic Health Science Centre, Salford Royal Hospital, Salford, U.K.; <sup>11</sup>Department of Rheumatology, Bristol Royal Infirmary, Bristol, U.K.; <sup>12</sup>Department of Rheumatology, Manchester University, Manchester, U.K.; <sup>13</sup>Victoria Hospital, Blackpool, Lancashire, U.K.; <sup>14</sup>Hitchingbrooke Hospital, Cambridgeshire, U.K.; <sup>15</sup>Department of Paediatric Rheumatology, Institute of Child Health, Birmingham, Children's Hospital-NHS Foundation Trust, University of Birmingham, Whittall Street, Birmingham, U.K.; <sup>16</sup>Nottingham University Hospital, Nottingham, U.K.; <sup>17</sup>Rheumatology Unit, Institute of Child Health, University College London, London, U.K.; <sup>18</sup>Department of Paediatric Rheumatology, Leeds Children Hospital, Leeds, U.K.

Childhood arthritis prospective study (CAPS) Group:

Eileen Baildam<sup>1</sup>, Nick Bishop<sup>2</sup>, Lynsey Brown<sup>1</sup>, Joanne Buckley<sup>3</sup>, Alice Chieng<sup>3</sup>, Roberto Carrasco<sup>4</sup>, Joanna Cobb<sup>4</sup>, Lucy Cook<sup>5</sup>, Joyce Davidson<sup>6,7</sup>, Annette Duggan<sup>3</sup>, Michael Eltringham<sup>5</sup>, Helen Foster<sup>5</sup>, Elizabeth Friel<sup>7</sup>, Mark Friswell<sup>5</sup>, Janet Gardner-Medwin<sup>7,8</sup>, Paul Gilbert<sup>4</sup>, Vikki Gould<sup>6</sup>, Kelly Hadfield<sup>4</sup>, Kimme Hyrich<sup>4</sup>, Julie Jones<sup>9</sup>, Sham Lal<sup>4</sup>, Mark Lay<sup>4</sup>, Gabrielle Lloyd<sup>1</sup>, Olivia Lloyd<sup>1</sup>, Carol Lydon<sup>1</sup>, Natasha Makengo<sup>9</sup>, Ann McGovern<sup>3</sup>, Alexandra Meijer<sup>9</sup>, Nicola Mills-Wierda<sup>7</sup>, Theresa Moorcroft<sup>1</sup>, Vicki Price<sup>7</sup>, Liang Qiao<sup>5</sup>, Kay Riding<sup>6</sup>, Jane Sim<sup>7</sup>, Tauny Southwood<sup>11</sup>, Wendy Thomson<sup>4</sup>, Maureen Todd<sup>7</sup>, Susan Tremble<sup>1</sup>, Katharine Venter<sup>1</sup>, Debbie Wade<sup>5</sup>, Peter Ward<sup>4</sup>, Sharon Watson<sup>7</sup>, Gwen Webster<sup>1</sup>, Lucy R Wedderburn<sup>9,10</sup>, Jadranka Zelenovic<sup>7</sup>

<sup>1</sup>Alder Hey Children's Hospital, Liverpool, U.K.; <sup>2</sup>Academic Unit of Child Health, University of Sheffield, Sheffield, U.K.; <sup>3</sup>The Royal Manchester Children's Hospital, Manchester, U.K.; <sup>4</sup>Arthritis Research UK Epidemiology Unit, Stopford Building, Manchester Academic Health Science Centre, NIHR Manchester Musculoskeletal Biomedical Research Unit, The University of Manchester, Manchester, M13 9PT, U.K.; <sup>5</sup>Royal Victoria Infirmary, Newcastle, U.K.; <sup>6</sup>Royal Hospital for Sick Children, Edinburgh, Scotland, U.K.; <sup>7</sup>Royal Hospital for Sick Children, Yorkhill Children's Hospital, Glasgow, Scotland, U.K.; <sup>8</sup>University of Glasgow, School of Medicine, Glasgow, Scotland, U.K.; <sup>9</sup>Great Ormond Street Hospital, London, U.K.; <sup>10</sup>Rheumatology Unit, UCL Institute of Child Health, London, U.K.; <sup>11</sup>Department of Paediatric Rheumatology, Institute of Child Health, Birmingham Children's Hospital, NHS Foundation Trust, University of Birmingham, Birmingham, U.K.

Randomized Placebo Phase Study of Rilonacept in sJIA (RAPPORT) Investigators:

James D. Birmingham<sup>1</sup>, Melissa Elder<sup>2</sup>, Beth S. Gottlieb<sup>3</sup>, Normal T. Ilowite<sup>4</sup>, Lisa F. Imundo<sup>5</sup>, Yukiko Kimura<sup>6</sup>, Yuliya Lohnygina<sup>7</sup>, Michael L. Miller<sup>8</sup>, Diana Milojevic<sup>9</sup>, Kathleen O'Neil<sup>10</sup>, Marilyn G. Punaro<sup>11</sup>, Kristi Prather<sup>7</sup>, Natasha M. Ruth<sup>12</sup>, Christy I. Sandborg<sup>13</sup>, Laura E. Schanberg<sup>14</sup>, David D. Sherry<sup>15</sup>, Nora G. Singer<sup>16</sup>, Steven J. Spalding<sup>17</sup>, Stacey E. Tarvin<sup>10</sup>, James W. Verbsky<sup>18</sup>, Carol A. Wallace<sup>19</sup>, and Lawrence S. Zemel<sup>20</sup>

<sup>1</sup>Michigan State University College of Human Medicine, East Lansing, MI; <sup>2</sup>University of Florida, Gainesville, FL; <sup>3</sup>Steven and Alexandra Cohen Children's Hospital, New York, NY; <sup>4</sup>Children's Hospital at Montefiore, Albert Einstein College of Medicine, Bronx, New York; <sup>5</sup>Morgan Stanley Children's Hospital of New York-Presbyterian, Columbia University Medical Center, New York, NY; <sup>6</sup>Joseph M. Sanzari Children's Hospital, Hackensack University Medical Center, Hackensack, NJ; <sup>7</sup>Duke Clinical Research Institute, Durham, NC; <sup>8</sup>Ann and Robert H. Lurie Children's Hospital, Chicago, IL; <sup>9</sup>University of California, San Francisco, CA; <sup>10</sup>Riley Hospital for Children, Indianapolis, IN; <sup>11</sup>Texas Scottish Rite Hospital, Dallas, TX; <sup>12</sup>Medical University of South Carolina, Charleston, SC; <sup>13</sup>Stanford University, Stanford, CA; <sup>14</sup>Duke University Medical Center, Durham, NC; <sup>15</sup>Children's Hospital of Philadelphia, PA; <sup>16</sup>Metro Health Medical Center, Cleveland, OH; <sup>17</sup>The Cleveland Clinic, Cleveland, OH; <sup>18</sup>Medical College of Wisconsin, Milwaukee, WI; <sup>19</sup>Seattle Children's Hospital & Research Institute, Seattle, WA; <sup>20</sup>Connecticut Children's Medical Center, Hartford, CT

Sparks-Childhood Arthritis Response to Medication Study (CHARMS) Group:

Kate Armon<sup>1,2</sup>, Katrin Burkle<sup>3</sup>, Joanna Cobb<sup>4</sup>, Rebecca Cutts<sup>5</sup>, Angela Etheridge<sup>6</sup>, Eirini Giannakopoulou<sup>6</sup>, Paul Gilbert<sup>4</sup>, Anne Hinks<sup>4</sup>, Shashi Hirani<sup>3</sup>, Clare Heard<sup>6</sup>, Ruth Howman<sup>7</sup>, Cerise Johnson<sup>6</sup>, Laura Kassoumeri<sup>6</sup>, Sham Lal<sup>4</sup>, Alice Leahy<sup>5</sup>, Lucy Marshall<sup>6</sup>, Laura Melville<sup>3</sup>, Halima Moncrieffe<sup>6</sup>, Kathleen Mulligan<sup>3</sup>, Stanton Newman<sup>3</sup>, Jason Palman<sup>6</sup>, Fiona Patrick<sup>6</sup>, Emily Robinson<sup>6</sup>, Stephanie Simou<sup>6</sup>, Stefanie Stafford<sup>8</sup>, Tauny Southwood<sup>7</sup>, Wendy Thomson<sup>4</sup>, Petra Tucker<sup>2</sup>, Simona Ursu<sup>6</sup>, Kishore Warriar<sup>8</sup>, Joanna Watts<sup>1</sup>, Lucy R Wedderburn<sup>6</sup>, Pamela Whitworth<sup>7</sup>, Patricia Woo<sup>9</sup>

<sup>1</sup>Norfolk & Norwich University Hospital NHF Foundation Trust, Birmingham, U.K.; <sup>2</sup>Cambridge University Hospital NHS Foundation Trust, Cambridge, U.K.; <sup>3</sup>Health Psychology, School of Health Sciences, City University, London, U.K.; <sup>4</sup>Arthritis Research UK Epidemiology Unit, Stopford Building, Manchester Academic Health Science Centre, NIHR Manchester Musculoskeletal Biomedical Research Unit, The University of Manchester, Manchester, U.K.; <sup>5</sup>University Hospital Southampton NHF Foundation Trust, Southampton, U.K.; <sup>6</sup>UCL GOSH Institute of Child Health, London U.K.; <sup>7</sup>Birmingham Children's Hospital NHS Foundation Trust, Birmingham, U.K.; <sup>8</sup>Nottingham University Hospitals NHS Trust, Nottingham, U.K. <sup>9</sup>Division of Infection and Immunity, University College London, London, U.K.

Biologically Based Outcome Predictors in JIA (BBOP) Group:

Adam Baxter-Jones<sup>1</sup>, Susanne Benseler<sup>2</sup>, Gilles Boire<sup>3</sup>, David A. Cabral<sup>4</sup>, Bonnie Cameron<sup>2</sup>, Sarah Campillo<sup>5</sup>, Gaëlle Chedeville<sup>5</sup>, Anne-Laure Chetaille<sup>6</sup>, Paul Dancey<sup>7</sup>, Ciaran Duffy<sup>8</sup>, Karen Watanabe Duffy<sup>8</sup>, Janet Ellsworth<sup>9</sup>, Michele Gibbon<sup>8</sup>, Chantal Guillet<sup>10</sup>, Jaime Guzman<sup>4</sup>, Kristin Houghton<sup>4</sup>, Adam M. Huber<sup>11</sup>, Roman Jurencak<sup>8</sup>, Bianca Lang<sup>11</sup>, Ronald M. Laxer<sup>2</sup>, Lynn Maenz<sup>1</sup>, Loren Matheson<sup>1</sup>, Kiem G. Oen<sup>12</sup>, Ross E. Petty<sup>4</sup>, Suzanne E. Ramsey<sup>11</sup>, Elham Rezaei<sup>1</sup>, Alan M. Rosenberg<sup>1</sup>, Johannes Roth<sup>8</sup>, Rayfel Schneider<sup>2</sup>, Rosie Scuccimarrì<sup>5</sup>, Stephen W. Scherer<sup>13</sup>, Earl Silverman<sup>2</sup>, Lynn Spiegel<sup>2</sup>, Elizabeth Stringer<sup>11</sup>, Shirley M. L. Tse<sup>2</sup>, Lori B. Tucker<sup>4</sup>, Stuart Turvey<sup>4</sup>, Richard F. Wintle<sup>14</sup> and Rae S. M. Yeung<sup>2</sup>

<sup>1</sup>University of Saskatchewan, Saskatoon, Canada; <sup>2</sup>The University of Toronto and The Hospital for Sick Children, Toronto, Canada; <sup>3</sup>Université de Sherbrooke, Sherbrooke, Canada; <sup>4</sup>British Columbia Children's Hospital, Vancouver, Canada; <sup>5</sup>McGill University, Montreal, Canada; <sup>6</sup>le Centre Hospitalier Universitaire de Quebec, Quebec, Canada; <sup>7</sup>Janeway Children's Health and Rehabilitation Centre, St. John's, Canada; <sup>8</sup>Children's Hospital of Eastern Ontario, Ottawa, Canada; <sup>9</sup>University of Alberta, Edmonton, Canada; <sup>10</sup>Sante et Services Sociaux, Quebec, Canada; <sup>11</sup>IWK Health Centre and Dalhousie University, Halifax, Canada; <sup>12</sup>University of Manitoba, Winnipeg, Canada; <sup>13</sup>The Centre for Applied Genomics, Hospital for Sick Children and McLaughlin Centre and Department of Molecular Genetics, University of Toronto, Toronto, Canada; <sup>14</sup>The Centre for Applied Genomics, Hospital for Sick Children, Toronto, Canada

Inception Cohort of Newly Diagnosed Patients with Juvenile Idiopathic Arthritis (ICON-JIA) Study Group:

Ivan Foeldvari<sup>1</sup>, Dirk Foell<sup>2</sup>, Gerd Ganser<sup>3</sup>, Johannes-Peter Haas<sup>4</sup>, Gerd Horneff<sup>5</sup>, Anton Hospach<sup>6</sup>, Hans-Iko Huppertz<sup>7</sup>, Tilmann Kallinich<sup>8</sup>, Jasmin Kümmerle-Deschner<sup>9</sup>, Kirsten Minden<sup>8</sup>, Kirsten Mönkemöller<sup>10</sup>, Angela-Roesen Wolff<sup>11</sup>, Klaus Tenbrock<sup>12</sup>;

Angelika Thon<sup>13</sup>

<sup>1</sup>Hamburg Centre for Pediatric and Adolescent Rheumatology, Hamburg, Germany; <sup>2</sup>University Hospital Münster, Münster, Germany; <sup>3</sup>St. Josef Stift, Seldenhorst, Germany; <sup>4</sup>German Center for Pediatric and Adolescent Rheumatology, Garmisch-Partenkirchen, Germany; <sup>5</sup>Asklepios Clinic Sankt Augustin, Sankt Augustin, Germany; <sup>6</sup>Klinikum Stuttgart Olgahospital, Stuttgart, Germany; <sup>7</sup>Professor Hess Children's Hospital, Bremen, Germany; <sup>8</sup>Charité University Medicine, Berlin, Germany; <sup>9</sup>University of Tübingen Hospital, Tübingen, Germany; <sup>10</sup>Municipal Children's Hospital Köln, Köln, Germany; <sup>11</sup>Children's Hospital Dresden, Dresden, Germany; <sup>12</sup>University Hospital RWTH Aachen, Aachen, Germany; <sup>13</sup>Medical University of Hannover, Children Hospital, Hannover, Germany

## **PATIENT SAMPLES**

Blood samples were obtained from children diagnosed with systemic juvenile idiopathic arthritis (sJIA) by pediatric rheumatologists at collaborating centers in nine countries (Tables 1 and S1). Centralized collections of sJIA patient samples were provided by the British Society for Paediatric and Adolescent Rheumatology's (BSPAR) Juvenile Idiopathic Arthritis Sample Repository at the University of Manchester; the Inception Cohort of Newly Diagnosed Patients with Juvenile Idiopathic Arthritis (ICON-JIA); the Randomized Placebo Phase Study of Rilonacept in the Treatment of Systemic Juvenile Idiopathic Arthritis (RAPPORT); the Childhood Arthritis Prevention Study (CAPS); the Sparks-Childhood Arthritis Response to Medication Study (CHARMS); and the Biologically Based Outcome Predictors in JIA (BBOP). Blood samples from geographically-matched control subjects were obtained, and where available existing SNP genotype data from geographically-matched population control individuals were utilized, *in silico* (Supplementary Table 3). *In silico* control populations included in the study included: 1437 healthy subjects from the University of Pittsburgh and the Cleveland Clinic Foundation with SNP genotypes generated on Illumina Human Omni 1M arrays; 832 healthy subjects from the Cincinnati Children's Hospital Medical Center with SNP genotypes generated on Illumina Human Omni 5M arrays; 1629 population controls from the 1958 British Birth Cohort with SNP genotypes generated on Illumina Human 1M Duo arrays; 2710 population controls from the U.K. National Blood Study with SNP genotypes generated on Illumina Human 1M Duo arrays; 511 healthy subject from the Hospital for Sick Children in Toronto, Canada with SNP genotypes generated with Illumina Human 1M arrays; 260 healthy subjects from Argentina with SNP genotypes generated with Illumina Human Omni 1M arrays; and 200 healthy subjects from Spain with SNP genotypes generated with Illumina HumanHap 300 arrays. Subjects were enrolled into the study in accordance with all local ethics regulations, with approval of each local institutional review board, and with the informed consent of a parent or guardian of each subject.

## **SNP GENOTYPING AND QUALITY CONTROL OPERATIONS**

SNP genotyping of genomic DNA from children with sJIA and healthy children was performed with Human Omni 1M arrays and an iScan bead array reader (Illumina) according to the manufacturer's specifications. SNP genotypes were simultaneously

called for the full set of directly genotyped samples using GenomeStudio software (Illumina) and custom cluster positions generated from the set of directly genotyped samples with the highest call rates. SNPs with GenTrain score  $< 0.35$  (123,541 SNPs) were excluded from further analysis. Samples were stratified by country of origin and affection status, and quality control procedures were performed separately on each group. Samples with call rate  $< 98\%$  or sample heterozygosity  $> 3$  s.d. from the population-specific mean were excluded from the analysis (Supplementary Table 3). *In silico* SNP genotype data from healthy control subjects were processed using the same quality control parameters, with the exception of the sample call rate, which was determined by analysis of the distribution of call rates within each dataset. Within each stratum, markers were excluded based on the following criteria: MAF  $< 0.05$ ; SNP call rate  $< 97\%$ ; or Hardy-Weinberg proportion test with  $P < 0.0001$  in the population-specific control population. This produced sets of between 156,136 and 740,509 high quality SNPs that were carried forward for subsequent analysis (Supplementary Tables 4).

#### **ASSESSMENT OF POPULATION STRATIFICATION AND ASSEMBLY OF CASE-CONTROL STRATA**

To ensure similarity of continental ancestry among the membership of each group of cases or controls, we merged the data from each sample group with SNP genotype data from the European (CEU and TSI), African (ASW, YRI), Asian (CHB, JPT), and Hispanic and South Asian (MEX and GIH) HapMap3 populations. Each dataset was pruned on the basis of pairwise linkage disequilibrium (LD), removing one member of each pair of SNPs with  $r^2 < 0.4$  using the estimation-maximization (EM) method. We also excluded the 24 regions of long-range LD identified by Price *et al*<sup>1</sup>. The LD-reduced datasets were subjected to multidimensional scaling analysis (MDS) with PLINK v1.07<sup>2</sup>. Outliers of continental ancestry were identified and excluded from each group by visual inspection of MDS plots. Principal components analysis (PCA) was subsequently performed on the LD-reduced SNP set from each group to more stringently identify and remove genetic outliers, thereby restricting the ancestral membership of the groups. In the U.S. case stratum, the datasets from the five contributing centers were consolidated into a single stratum, retaining only the intersecting set of SNPs from the five groups. Pairwise comparisons of allelic frequencies were performed between the five groups to and SNPs whose frequencies differed significantly ( $p < 5 \times 10^{-8}$ ) between any pair of U.S. sJIA groups were excluded. PCA was repeated on the full U.S. case stratum to insure common ancestry across the five groups. Geographically-matched case and control groups were each combined to form the nine case-control strata, each composed of the SNP intersection between the respective case and control groups. Finally, PCA was performed on LD-reduced SNP sets from each case-control stratum to identify and exclude ancestrally dissimilar individuals. Genomic control inflation factors were also calculated using the LD-reduced sets of SNPs from each case-control stratum to objectively quantify their ancestral composition. The sample quality control process produced nine case-control strata with a total of 770 sJIA cases and 6947 control subjects that were subsequently analyzed (Table 1, Supplementary Table 3).

## **SNP IMPUTATION, ASSOCIATION TESTING, AND META-ANALYSIS OF THE MHC LOCUS**

Using the high-quality sets of directly genotyped SNPs, we performed genome-wide SNP imputation separately in each separately in each of the nine case-control strata. Genotypes were phased using the Markov Chain Monte Carlo algorithm implemented in IMPUTE2 v2.3.2<sup>3</sup> software. SNP imputation was performed using IMPUTE2 v2.3.2 and a multi-ethnic reference panel of phased haplotypes from the 1000Genomes project (Phase3 integrated dataset), as previously described<sup>4</sup>. Following SNP imputation, genotypic probabilities from the set of common SNPs (MAF > 0.04 in case collections) that were imputed with high quality (info > 0.8) were subjected to frequentist association testing with SNPTTESTv2.5 software under the additive and dominant models, adjusting for gender and ancestry informative principal components. Association meta-analyses were performed using GWAMA<sup>5</sup> software under the fixed-effect model. Heterogeneity of effect was evaluated in using the  $I^2$  statistic and markers with a high probability of heterogeneity ( $I^2 > 0.7$ ) were excluded. The meta-analytic associations of the set of SNPs with ORs between 0.25 and four that were evaluated in 4 or more strata and a minimum of 2500 samples were included in subsequent analyses.

## **COMPARISON OF GENETIC ARCHITECTURE OF SYSTEMIC JUVENILE IDIOPATHIC ARTHRITIS WITH THOSE OF OLIGOARTICULAR AND POLYARTICULAR FORMS OF JUVENILE IDIOPATHIC ARTHRITIS**

To compare the genetic architecture of sJIA with those of oligoarticular and seronegative polyarticular juvenile idiopathic arthritis (JIA), we analyzed weighted genetic risk scores (wGRS) according to the method of Karlson and colleagues<sup>6</sup>. wGRS were calculated in each individual as the sum of the risk allele counts, weighted by the natural logarithm of the odds ratio (OR). For the group of oligoarticular and seropositive polyarticular JIA (polygoJIA), the wGRS incorporated 23 independent polygoJIA risk SNPs reported by Hinks and colleagues<sup>7</sup>. For rheumatoid factor positive polyarticular JIA (RF+polyJIA), we utilized the wGRS-11 that was previously reported by Prahallad and colleagues<sup>8</sup>. For each wGRS, scatter plots and kernel density plots were generated to visually compare the wGRS distributions between the cases and controls in each stratum and in the full collection. The case and control distributions of risk alleles and wGRSs were evaluated with the non-parametric Wilcoxon Rank Sum Test. Association of wGRSs with sJIA was also tested in each individual stratum and in the full study collection using logistic regression, adjusted for gender and ancestry. Furthermore, receiver operator characteristic (ROC) curves were generated and the area under the curve (AUC) calculation was performed using R in each of the 9 strata and in the full study population to determine the ability of the wGRSs to discriminate between sJIA and other JIA subtypes. In to wGRS analyses, the genetic architecture of sJIA was compared with that of polygoJIA using conditional quantile-quantile (Q-Q) plots, as previously reported<sup>9</sup>. Specifically, we generated a Q-Q plot of meta-analytic association with sJIA for all SNPs that were also examined in the study of polygoJIA by Hinks and colleagues<sup>7</sup>. We also created Q-Q plots for five sets of SNPs with increasing levels of association with polygoJIA:  $p < 0.1$ ;  $p < 0.01$ ;  $p < 0.001$ ;  $p < 0.0001$ ; and  $p < 0.00001$ .

## SUPPLEMENTARY TEXT REFERENCES

1. Price AL, Weale ME, Patterson N, et al. Long-range LD can confound genome scans in admixed populations. *Am J Hum Genet* 2008; **83**(1): 132-5; author reply 5-9.
2. Purcell S, Neale B, Todd-Brown K, et al. PLINK: a tool set for whole-genome association and population-based linkage analyses. *Am J Hum Genet* 2007; **81**(3): 559-75.
3. Howie BN, Donnelly P, Marchini J. A flexible and accurate genotype imputation method for the next generation of genome-wide association studies. *PLoS Genet* 2009; **5**(6): e1000529.
4. Howie B, Marchini J, Stephens M. Genotype imputation with thousands of genomes. *G3 (Bethesda)* 2011; **1**(6): 457-70.
5. Magi R, Morris AP. GWAMA: software for genome-wide association meta-analysis. *BMC Bioinformatics* 2010; **11**: 288.
6. Karlson EW, Chibnik LB, Kraft P, et al. Cumulative association of 22 genetic variants with seropositive rheumatoid arthritis risk. *Ann Rheum Dis* 2010; **69**(6): 1077-85.
7. Hinks A, Cobb J, Marion MC, et al. Dense genotyping of immune-related disease regions identifies 14 new susceptibility loci for juvenile idiopathic arthritis. *Nat Genet* 2013; **45**(6): 664-9.
8. Prahalad S, Conneely KN, Jiang Y, et al. Susceptibility to childhood-onset rheumatoid arthritis: investigation of a weighted genetic risk score that integrates cumulative effects of variants at five genetic loci. *Arthritis Rheum* 2013; **65**(6): 1663-7.
9. Liley J, Wallace C. A pleiotropy-informed Bayesian false discovery rate adapted to a shared control design finds new disease associations from GWAS summary statistics. *PLoS Genet* 2015; **11**(2): e1004926.

**Table S1. Variables included in the polygo JIA weighted genetic risk score (polygo-wGRS)**

| <b>Gene/Locus</b>        | <b>Marker</b> | <b>Polygo JIA Risk Allele</b> |
|--------------------------|---------------|-------------------------------|
| <i>HLA-DQB1-HLA-DQA2</i> | rs7775055     | G                             |
| <i>PTPN22</i>            | rs6679677     | A                             |
| <i>STAT4</i>             | rs10174238    | G                             |
| <i>PTPN2</i>             | rs2847293     | A                             |
| <i>ANKRD55</i>           | rs71624119    | G                             |
| <i>ANKRD55</i>           | rs10213692    | T                             |
| <i>IL2-IL2I</i>          | rs1479924     | A                             |
| <i>IL2RA</i>             | rs7909519     | A                             |
| <i>SH2B3-ATXN2</i>       | rs3184504     | A                             |
| <i>SH2B3-ATXN2</i>       | rs7137828     | C                             |
| <i>ERAP2-LNPEP</i>       | rs27290       | G                             |
| <i>ERAP2-LNPEP</i>       | rs27293       | A                             |
| <i>UBE2L3</i>            | rs2266959     | A                             |
| <i>C5orf56-IRF1</i>      | rs6894249     | A                             |
| <i>C5orf56-IRF1</i>      | rs4705862     | A                             |
| <i>RUNX1</i>             | rs8129030     | A                             |
| <i>RUNX1</i>             | rs9979383     | A                             |
| <i>IL2RB</i>             | rs2284033     | G                             |
| <i>ATP8B2-IL6R</i>       | rs11265608    | A                             |
| <i>ATP8B2-IL6R</i>       | rs72698115    | C                             |
| <i>FAS</i>               | rs7069750     | C                             |
| <i>ZFP36L1</i>           | rs12434551    | T                             |
| <i>ZFP36L1</i>           | rs3825568     | C                             |

Polygo, rheumatoid factor negative polyarticular and oligoarticular juvenile idiopathic arthritis. wGRS, weighted genetic risk scores. sJIA, systemic juvenile idiopathic arthritis.



**Table S2. Variables included in the rheumatoid factor positive polyarticular JIA weighted genetic risk score (wGRS-11) from Prahald *et al.*<sup>a</sup>**

| <b>Gene</b>     | <b>Marker</b> | <b>RF+ Poly JIA Risk Allele</b> |
|-----------------|---------------|---------------------------------|
| <i>HLA-DRB1</i> | HLA-DRB1*0101 | Present                         |
| <i>HLA-DRB1</i> | HLA-DRB1*0401 | Present                         |
| <i>HLA-DRB1</i> | HLA-DRB1*0404 | Present                         |
| <i>HLA-DRB1</i> | HLA-DRB1*0405 | Present                         |
| <i>HLA-DRB1</i> | HLA-DRB1*1001 | Present                         |
| <i>HLA-DRB1</i> | HLA-DRB1*0901 | Present                         |
| <i>PTPN22</i>   | rs2476601     | T                               |
| <i>STAT4</i>    | rs7574865     | T                               |
| <i>TNFAIP3</i>  | rs10499194    | T                               |
| <i>TNFAIP3</i>  | rs6920220     | A                               |
| <i>TRAF-C5</i>  | rs3761847     | G                               |

<sup>a</sup> In the report by Prahald *et al.*<sup>18</sup>, the wGRS-11 was significantly associated with rheumatoid factor positive polyarticular JIA (odds ratio = 3.32;  $p < 2 \times 10^{-16}$ ).

**Table S3. Summary of sample quality control procedures**

|                                   | Stratum                         | Population          | Samples        | EXCLUSION CRITERIA |             |              |              |             | Excluded      | Included       |
|-----------------------------------|---------------------------------|---------------------|----------------|--------------------|-------------|--------------|--------------|-------------|---------------|----------------|
|                                   |                                 |                     |                | Heterozygosity     | Call Rate   | Relatedness  | MDS          | PCA         |               |                |
| <b>Directly Genotyped Samples</b> | U.S.                            | Cincinnati sJIA     | 225            | 14                 | 0           | 8            | 41           | 10          | 64            | 161            |
|                                   |                                 | Stanford sJIA       | 34             | 0                  | 0           | 0            | 19           | 2           | 21            | 13             |
|                                   |                                 | Utah sJIA           | 42             | 2                  | 0           | 0            | 8            | 4           | 10            | 32             |
|                                   |                                 | Emory sJIA          | 20             | 0                  | 0           | 0            | 6            | 1           | 7             | 13             |
|                                   |                                 | RAPPORT sJIA        | 40             | 0                  | 0           | 1            | 13           | 2           | 16            | 24             |
|                                   | U.K.                            | U.K. sJIA           | 228            | 6                  | 12          | 0            | 10           | 4           | 26            | 202            |
|                                   | Germany                         | Germany sJIA        | 159            | 4                  | 0           | 11           | 17           | 14          | 44            | 115            |
|                                   |                                 | Germany controls    | 209            | 0                  | 0           | 11           | 4            | 3           | 16            | 193            |
|                                   | Turkey                          | Turkey sJIA         | 54             | 3                  | 0           | 1            | 0            | 1           | 5             | 49             |
|                                   |                                 | Turkey controls     | 96             | 0                  | 2           | 0            | 0            | 0           | 2             | 94             |
|                                   | Italy                           | Italy sJIA          | 55             | 2                  | 3           | 1            | 2            | 0           | 6             | 49             |
|                                   |                                 | Italy controls      | 60             | 1                  | 0           | 0            | 0            | 0           | 1             | 59             |
|                                   | Brazil                          | Brazil sJIA         | 51             | 1                  | 0           | 0            | 2            | 0           | 3             | 48             |
|                                   |                                 | Brazil controls     | 66             | 1                  | 0           | 1            | 2            | 0           | 4             | 62             |
|                                   | Argentina                       | Argentina sJIA      | 33             | 0                  | 0           | 0            | 0            | 0           | 0             | 33             |
| Canada                            | Canada sJIA                     | 25                  | 0              | 0                  | 0           | 8            | 0            | 8           | 17            |                |
| Spain                             | Spain sJIA                      | 16                  | 1              | 1                  | 0           | 0            | 0            | 2           | 14            |                |
| <b>Total (sJIA/controls)</b>      |                                 |                     | <b>982/431</b> | <b>33/2</b>        | <b>16/2</b> | <b>22/12</b> | <b>126/6</b> | <b>38/3</b> | <b>212/23</b> | <b>770/408</b> |
| <b>In Silico Samples</b>          | U.S.                            | Pitt/CCF Controls   | 1437           | 21                 | 61          | 0            | 0            | 438         | 511           | 926            |
|                                   |                                 | Cincinnati Controls | 832            | 33                 | 0           | 0            | 0            | 7           | 40            | 792            |
|                                   | U.K.                            | 1958BC Controls     | 1629           | 8                  | 11          | 19           | 0            | 14          | 33            | 1596           |
|                                   |                                 | NBS Controls        | 2710           | 111                | 0           | 48           | 0            | 51          | 209           | 2501           |
|                                   | Spain                           | Spain Controls      | 200            | 5                  | 4           | 9            | 0            | 0           | 18            | 182            |
|                                   | Argentina                       | Argentina Controls  | 260            | 6                  | 47          | 16           | 0            | 132         | 145           | 115            |
|                                   | Canada                          | Canada Controls     | 511            | 6                  | 36          | 36           | 0            | 45          | 84            | 427            |
|                                   | <b>Total in silico controls</b> |                     |                | <b>7579</b>        | <b>191</b>  | <b>159</b>   | <b>128</b>   | <b>0</b>    | <b>641</b>    | <b>1040</b>    |

sJIA, systemic juvenile idiopathic arthritis. Pitt, University of Pittsburgh. CCF, Cleveland Clinic Foundation. 1958BC, U.K.1958 British Birth Cohort. NBS, U.K. National Blood Service Study. MDS, multidimensional scaling. PCA, principal components analysis. From Ombrello MJ *et al. Proc Natl Acad Sci U S A* 2015; 112(52): 15970-5.

**Table S4. Summary of SNP quality control procedures**

| Stratum   | Population           | EXCLUSION CRITERIA |           |               |           |         |           |           | Intersecting directly genotyped SNPs | Imputed SNPs | Imputed SNPs (post-QC) |
|-----------|----------------------|--------------------|-----------|---------------|-----------|---------|-----------|-----------|--------------------------------------|--------------|------------------------|
|           |                      | SNPs               | MAF < 5%  | Non-Autosomal | Call Rate | HWE     | Excluded  | Remaining |                                      |              |                        |
| U.S.      | Merged U.S. sJIA     | 1,062,530          | 445,457   |               | 2448      |         | 447,905   | 614,625   | 476,196                              | 18,263,974   | 6,189,397              |
|           | Cincinnati Controls* | 4,292,363          | 2,555,243 | 18,823        | 52,643    | 120,073 | 2,620,221 | 1,672,142 |                                      |              |                        |
|           | Pitt/CCF Controls*   | 1,053,035          | 334,026   |               | 18,839    | 2550    | 363,570   | 698,960   |                                      |              |                        |
| U.K.      | U.K. sJIA            | 1,062,530          | 347,154   |               | 23,363    |         | 370,517   | 692,013   | 440,688                              | 18,263,701   | 6,255,387              |
|           | 1958BC Controls*     | 914,714            | 86,149    |               | 0         | 2991    | 89,140    | 825,574   |                                      |              |                        |
|           | NBS Controls*        | 1,115,428          | 178,713   | 1537          | 20,224    | 14,374  | 214,848   | 900,580   |                                      |              |                        |
| Germany   | Germany sJIA         | 1,062,530          | 349,606   |               | 6,974     |         | 356,580   | 705,950   | 682,516                              | 18,266,121   | 6,391,432              |
|           | Germany Controls     | 1,062,530          | 349,193   |               | 14,537    | 760     | 363,991   | 698,539   |                                      |              |                        |
| Turkey    | Turkey sJIA          | 1,062,530          | 332,343   |               | 4744      |         | 337,087   | 725,443   | 682,598                              | 18,270,612   | 6,389,103              |
|           | Turkey Controls      | 1,062,530          | 337,395   |               | 22,045    | 560     | 359,667   | 702,863   |                                      |              |                        |
| Italy     | Italy sJIA           | 1,062,530          | 340,450   |               | 9930      |         | 350,380   | 712,150   | 686,397                              | 18,269,173   | 6,375,260              |
|           | Italy Controls       | 1,062,530          | 340,986   |               | 3756      | 388     | 344,919   | 717,611   |                                      |              |                        |
| Brazil    | Brazil sJIA          | 1,062,530          | 277,488   |               | 3174      |         | 280,662   | 781,868   | 740,509                              | 18,263,563   | 6,698,947              |
|           | Brazil Controls      | 1,062,530          | 288,033   |               | 7968      | 430     | 296,197   | 766,333   |                                      |              |                        |
| Argentina | Argentina sJIA       | 1,062,530          | 347,035   |               | 20,552    |         | 367,587   | 694,943   | 659,100                              | 18,263,401   | 6,129,601              |
|           | Argentina Controls*  | 985,839            | 272,864   |               | 68,333    | 482     | 273,105   | 712,734   |                                      |              |                        |
| Canada    | Canada sJIA          | 1,062,530          | 357,390   |               | 29,262    |         | 386,652   | 675,878   | 396,935                              | 18,263,146   | 5,812,530              |
|           | Canada Controls*     | 1,027,449          | 242,748   | 22,510        | 26,109    | 3636    | 270,675   | 736,311   |                                      |              |                        |
| Spain     | Spain sJIA           | 1,062,530          | 375,042   |               | 38,205    |         | 413,247   | 649,283   | 156,136                              | 18,261,199   | 4,147,550              |
|           | Spain Controls*      | 311,273            | 10,432    | 8350          | 5078      | 3512    | 17,266    | 287,593   |                                      |              |                        |

\* *in silico* control populations. SNP, single nucleotide polymorphism. MAF, minor allele frequency. HWE, Hardy Weinberg equilibrium. QC, quality control. modified from Ombrello MJ *et al. Proc Natl Acad Sci U S A* 2015; 112(52): 15970-5.

**Table S5. Examination of peak SNPs from polygoJIA susceptibility loci in sJIA case-control collections \***

| PolygoJIA risk locus <sup>a</sup> | PolygoJIA peakSNP | PolygoJIA p-value      | PolygoJIA OR (95 C.I.) | sJIA p-value <sup>b,c</sup> | sJIA OR (95 C.I.) | $I^2$ | N studies/ N samples |
|-----------------------------------|-------------------|------------------------|------------------------|-----------------------------|-------------------|-------|----------------------|
| <b>HLA-DQB1-<br/>HLA-DQA2</b>     | rs7775055         | $3.1 \times 10^{-174}$ | 6.0 (5.3, 6.8)         | 0.3                         | 1.5 (0.7, 2.8)    | 0     | 3/399                |
| <b>PTPN22</b>                     | rs6679677         | $1.4 \times 10^{-12}$  | 1.6 (1.5, 1.7)         | 0.1                         | 1.2 (1.0, 1.5)    | 0     | 6/7314               |
| <b>STAT4</b>                      | rs10174238        | $1.3 \times 10^{-13}$  | 1.3 (1.2, 1.4)         | 0.2                         | 1.2 (0.9, 1.6)    | 0.46  | 3/559                |
| <b>PTPN2</b>                      | rs2847293         | $1.4 \times 10^{-12}$  | 1.3 (1.2, 1.4)         | 0.1                         | 0.7 (0.4, 1.2)    | 0.25  | 7/7408               |
| <b>ANKRD55</b>                    | rs71624119        | $4.4 \times 10^{-11}$  | 0.8 (0.7, 0.8)         | $2.8 \times 10^{-3}$        | 0.7 (0.6, 0.9)    | 0.10  | 4/2517               |
|                                   | rs10213692        | $2.7 \times 10^{-11}$  | 0.8 (0.7, 0.8)         | $2.9 \times 10^{-3}$        | 0.7 (0.6, 0.9)    | 0.16  | 4/2516               |
| <b>IL2-IL2I</b>                   | rs1479924         | $6.2 \times 10^{-11}$  | 0.8 (0.7, 0.9)         | 0.5                         | 1.1 (0.8, 1.5)    | 0     | 9/7713               |
| <b>IL2RA</b>                      | rs7909519         | $8.0 \times 10^{-10}$  | 0.7 (0.6, 0.8)         | 0.2                         | 0.9 (0.7, 1.1)    | 0.57  | 9/7711               |
| <b>SH2B3-ATXN2</b>                | rs3184504         | $2.6 \times 10^{-9}$   | 1.2 (1.1, 1.3)         | 0.09                        | 1.1 (1.0, 1.2)    | 0     | 9/7714               |
|                                   | rs7137828         | $1.6 \times 10^{-9}$   | 1.2 (1.1, 1.3)         | 0.1                         | 1.1 (1.0, 1.2)    | 0     | 9/7708               |
| <b>ERAP2-LNPEP</b>                | rs27290           | $7.5 \times 10^{-9}$   | 1.3 (1.2, 1.5)         | 0.06                        | 1.2 (1.0, 1.5)    | 0     | 9/7713               |
|                                   | rs27293           | $7.4 \times 10^{-9}$   | 1.3 (1.2, 1.4)         | 0.06                        | 1.2 (1.0, 1.5)    | 0     | 9/7712               |
| <b>UBE2L3</b>                     | rs2266959         | $6.2 \times 10^{-9}$   | 1.2 (1.2, 1.3)         | 0.3                         | 1.1 (0.9, 1.3)    | 0     | 9/7713               |
| <b>C5orf56-IRF1</b>               | rs6894249         | $9.7 \times 10^{-10}$  | 0.8 (0.7, 0.8)         | 0.5                         | 1.1 (0.9, 1.3)    | 0     | 9/7711               |
|                                   | rs4705862         | $1.0 \times 10^{-8}$   | 0.8 (0.8, 0.9)         | 0.5                         | 1.0 (0.9, 1.1)    | 0     | 8/7513               |
| <b>RUNX1</b>                      | rs8129030         | $5.4 \times 10^{-9}$   | 0.8 (0.7, 0.8)         | 0.7                         | 1.0 (0.9, 1.1)    | 0     | 8/7513               |
|                                   | rs9979383         | $1.1 \times 10^{-8}$   | 0.8 (0.7, 0.9)         | 0.9                         | 1.0 (0.9, 1.1)    | 0     | 8/7520               |
| <b>IL2RB</b>                      | rs2284033         | $1.6 \times 10^{-8}$   | 0.8 (0.8, 0.9)         | 0.5                         | 1.0 (0.9, 1.2)    | 0     | 9/7716               |
| <b>ATP8B2-IL6R</b>                | rs11265608        | $2.8 \times 10^{-8}$   | 1.3 (1.2, 1.5)         | 0.03                        | 1.3 (1.0, 1.6)    | 0     | 6/7229               |
|                                   | rs72698115        | $1.3 \times 10^{-8}$   | 1.4 (1.2, 1.5)         | 0.05                        | 1.3 (1.0, 1.6)    | 0     | 6/7226               |
| <b>FAS</b>                        | rs7069750         | $2.9 \times 10^{-8}$   | 1.2 (1.1, 1.3)         | 0.6                         | 1.0 (0.9, 1.2)    | 0     | 9/7712               |
| <b>ZFP36L1</b>                    | rs12434551        | $1.6 \times 10^{-8}$   | 0.8 (0.7, 0.9)         | 0.5                         | 1.0 (0.9, 1.1)    | 0.38  | 9/7711               |
|                                   | rs3825568         | $1.2 \times 10^{-8}$   | 0.8 (0.7, 0.8)         | 0.8                         | 1.0 (0.9, 1.1)    | 0.43  | 9/7712               |

\* *TYK2* variant was not examined because its frequency was below the quality control thresholds of the present study. <sup>a</sup> Peak polygoJIA-associated SNPs as reported by Hinks *et al.*<sup>11</sup>. <sup>b</sup> Association testing was performed under the same model reported by Hinks *et al.*<sup>11</sup>. <sup>c</sup> Significance threshold is  $p < 0.0022$  ( $0.05 / 23$  independent SNPs tested). SNP, single nucleotide polymorphism. polygoJIA, rheumatoid factor negative polyarticular and oligoarticular juvenile idiopathic arthritis. OR, odds ratio for the minor allele. 95 C.I., 95% confidence interval of the odds ratio. sJIA, systemic juvenile idiopathic arthritis.  $I^2$ ,  $I^2$  test of heterogeneity. N studies, number of strata included in meta-analysis. N samples, number of samples (cases + controls) included in meta-analysis.

**Table S6. Minor allele frequencies of polygoJIA risk SNPs in from polygoJIA ImmunoChip study and from INCHARGE sJIA case and control collections.**

| Polygo risk SNP | Hinks et al. |      | U.K. |      | U.S. |      | Germany |      | Italy |      | Turkey |      | Brazil |      | Argentina |      | Canada |      | Spain |      |
|-----------------|--------------|------|------|------|------|------|---------|------|-------|------|--------|------|--------|------|-----------|------|--------|------|-------|------|
|                 | Polygo       | HC   | sJIA | HC   | sJIA | HC   | sJIA    | HC   | sJIA  | HC   | sJIA   | HC   | sJIA   | HC   | sJIA      | HC   | sJIA   | HC   | sJIA  | HC   |
| rs7775055       | 0.12         | 0.02 | 0.03 | 0.02 | 0.04 | 0.03 | 0.04    | 0.03 | 0.01  | 0.03 | 0.05   | 0.02 | 0.07   | 0.07 | 0.12      | 0.09 | 0.00   | 0.02 | 0.04  | 0.02 |
| rs6679677       | 0.14         | 0.10 | 0.10 | 0.10 | 0.10 | 0.08 | 0.13    | 0.10 | 0.06  | 0.04 | 0.03   | 0.04 | 0.01   | 0.03 | 0.03      | 0.04 | 0.15   | 0.10 | 0.10  | 0.07 |
| rs10174238      | 0.28         | 0.23 | 0.24 | 0.24 | 0.24 | 0.26 | 0.25    | 0.20 | 0.30  | 0.19 | 0.26   | 0.30 | 0.33   | 0.32 | 0.29      | 0.39 | 0.36   | 0.25 | 0.44  | 0.23 |
| rs2847293       | 0.20         | 0.17 | 0.13 | 0.16 | 0.15 | 0.16 | 0.11    | 0.13 | 0.16  | 0.11 | 0.18   | 0.09 | 0.17   | 0.19 | 0.12      | 0.12 | 0.15   | 0.15 | 0.04  | 0.16 |
| rs71624119      | 0.20         | 0.25 | 0.20 | 0.23 | 0.18 | 0.23 | 0.23    | 0.28 | 0.23  | 0.19 | 0.19   | 0.25 | 0.16   | 0.19 | 0.13      | 0.16 | 0.23   | 0.22 | 0.15  | 0.23 |
| rs10213692      | 0.20         | 0.25 | 0.20 | 0.24 | 0.18 | 0.23 | 0.23    | 0.28 | 0.23  | 0.19 | 0.18   | 0.25 | 0.17   | 0.20 | 0.13      | 0.16 | 0.24   | 0.22 | 0.15  | 0.23 |
| rs1479924       | 0.24         | 0.29 | 0.25 | 0.29 | 0.29 | 0.28 | 0.28    | 0.24 | 0.35  | 0.32 | 0.24   | 0.23 | 0.28   | 0.26 | 0.21      | 0.19 | 0.09   | 0.27 | 0.32  | 0.32 |
| rs7909519       | 0.08         | 0.11 | 0.07 | 0.11 | 0.12 | 0.10 | 0.09    | 0.12 | 0.06  | 0.07 | 0.13   | 0.08 | 0.06   | 0.09 | 0.06      | 0.05 | 0.09   | 0.10 | 0.19  | 0.08 |
| rs3184504       | 0.54         | 0.49 | 0.51 | 0.48 | 0.53 | 0.49 | 0.48    | 0.47 | 0.50  | 0.45 | 0.40   | 0.36 | 0.37   | 0.38 | 0.36      | 0.34 | 0.59   | 0.49 | 0.36  | 0.44 |
| rs7137828       | 0.54         | 0.49 | 0.50 | 0.48 | 0.53 | 0.49 | 0.49    | 0.47 | 0.49  | 0.45 | 0.39   | 0.36 | 0.36   | 0.38 | 0.36      | 0.36 | 0.58   | 0.49 | 0.36  | 0.44 |
| rs27290         | 0.47         | 0.44 | 0.43 | 0.45 | 0.42 | 0.45 | 0.40    | 0.46 | 0.35  | 0.41 | 0.33   | 0.26 | 0.34   | 0.29 | 0.29      | 0.32 | 0.50   | 0.44 | 0.31  | 0.40 |
| rs27293         | 0.47         | 0.44 | 0.43 | 0.45 | 0.42 | 0.45 | 0.40    | 0.46 | 0.35  | 0.41 | 0.33   | 0.26 | 0.34   | 0.29 | 0.29      | 0.32 | 0.50   | 0.44 | 0.31  | 0.40 |
| rs2266959       | 0.22         | 0.19 | 0.21 | 0.19 | 0.19 | 0.19 | 0.17    | 0.21 | 0.25  | 0.17 | 0.27   | 0.18 | 0.23   | 0.24 | 0.38      | 0.30 | 0.21   | 0.18 | 0.25  | 0.17 |
| rs6894249       | 0.35         | 0.39 | 0.37 | 0.39 | 0.38 | 0.38 | 0.40    | 0.40 | 0.37  | 0.27 | 0.44   | 0.38 | 0.48   | 0.50 | 0.52      | 0.47 | 0.27   | 0.35 | 0.37  | 0.37 |
| rs4705862       | 0.39         | 0.44 | 0.42 | 0.44 | 0.42 | 0.43 | 0.44    | 0.45 | 0.46  | 0.36 | 0.45   | 0.50 | 0.44   | 0.44 | 0.48      | 0.49 | 0.31   | 0.41 | 0.45  | 0.42 |
| rs8129030       | 0.33         | 0.37 | 0.38 | 0.37 | 0.37 | 0.37 | 0.33    | 0.37 | 0.31  | 0.39 | 0.30   | 0.35 | 0.23   | 0.27 | 0.33      | 0.34 | 0.41   | 0.33 | 0.28  | 0.36 |
| rs9979383       | 0.33         | 0.37 | 0.39 | 0.37 | 0.38 | 0.37 | 0.33    | 0.37 | 0.32  | 0.41 | 0.31   | 0.37 | 0.23   | 0.26 | 0.35      | 0.34 | 0.41   | 0.34 | 0.27  | 0.37 |
| rs2284033       | 0.39         | 0.44 | 0.45 | 0.44 | 0.41 | 0.42 | 0.44    | 0.39 | 0.36  | 0.42 | 0.36   | 0.41 | 0.35   | 0.32 | 0.45      | 0.33 | 0.44   | 0.40 | 0.43  | 0.40 |
| rs11265608      | 0.12         | 0.10 | 0.11 | 0.10 | 0.12 | 0.09 | 0.15    | 0.13 | 0.04  | 0.04 | 0.03   | 0.02 | 0.11   | 0.05 | 0.03      | 0.05 | 0.06   | 0.10 | 0.00  | 0.08 |
| rs72698115      | 0.12         | 0.10 | 0.11 | 0.10 | 0.12 | 0.09 | 0.15    | 0.12 | 0.04  | 0.04 | 0.03   | 0.02 | 0.05   | 0.05 | 0.02      | 0.05 | 0.05   | 0.10 | 0.00  | 0.08 |
| rs7069750       | 0.48         | 0.44 | 0.45 | 0.44 | 0.47 | 0.45 | 0.43    | 0.42 | 0.46  | 0.47 | 0.39   | 0.44 | 0.48   | 0.48 | 0.49      | 0.45 | 0.46   | 0.46 | 0.37  | 0.45 |
| rs12434551      | 0.43         | 0.47 | 0.46 | 0.47 | 0.44 | 0.47 | 0.47    | 0.45 | 0.48  | 0.36 | 0.38   | 0.55 | 0.50   | 0.40 | 0.49      | 0.44 | 0.41   | 0.43 | 0.43  | 0.49 |
| rs3825568       | 0.42         | 0.46 | 0.46 | 0.47 | 0.45 | 0.47 | 0.47    | 0.45 | 0.49  | 0.36 | 0.38   | 0.55 | 0.48   | 0.38 | 0.48      | 0.45 | 0.41   | 0.44 | 0.44  | 0.49 |

PolygoJIA, rheumatoid factor negative polyarticular and oligoarticular juvenile idiopathic arthritis. SNP, single nucleotide polymorphism. sJIA, systemic juvenile idiopathic arthritis. HC, healthy control subject.

**Table S7. Evaluation of polygo-wGRS in sJIA case-control collections**

| Stratum         | Wilcoxon Rank Sum Test p-value |                     | Polygo-wGRS Logistic Regression p-value |
|-----------------|--------------------------------|---------------------|-----------------------------------------|
|                 | Polygo-wGRS                    | Polygo Risk Alleles |                                         |
| Full collection | 0.065                          | 0.112               | 0.261                                   |
| Argentina       | 0.761                          | 0.394               | 0.479                                   |
| Brazil          | 0.945                          | 0.494               | 0.967                                   |
| Canada          | 0.720                          | 0.134               | 0.799                                   |
| Germany         | 0.732                          | 0.558               | 0.696                                   |
| Italy           | 0.926                          | 0.939               | 0.819                                   |
| Spain           | 0.546                          | 0.828               | 0.944                                   |
| Turkey          | 0.415                          | 0.080               | 0.491                                   |
| U.K.            | 0.173                          | 0.103               | 0.450                                   |
| U.S.            | 0.497                          | 0.350               | 0.462                                   |

Polygo, rheumatoid factor negative polyarticular and oligoarticular juvenile idiopathic arthritis. wGRS, weighted genetic risk scores. sJIA, systemic juvenile idiopathic arthritis.

**Table S8. Evaluation of RF+poly-wGRS in sJIA case-control collections**

| Stratum         | Wilcoxon Rank Sum Test p-value |                      | RF+Poly-wGRS Logistic Regression p-value |
|-----------------|--------------------------------|----------------------|------------------------------------------|
|                 | RF+Poly wGRS                   | RF+Poly Risk Alleles |                                          |
| Full collection | 0.006                          | 0.747                | 0.0151                                   |
| Argentina       | 0.732                          | 1.0                  | 0.894                                    |
| Brazil          | 0.508                          | 0.479                | 0.388                                    |
| Canada          | 0.522                          | 0.836                | 0.341                                    |
| Germany         | 0.798                          | 0.889                | 0.992                                    |
| Italy           | 0.777                          | 0.862                | 0.732                                    |
| Spain           | 0.435                          | 0.693                | 0.154                                    |
| Turkey          | 0.643                          | 0.397                | 0.906                                    |
| U.K.            | 0.197                          | 0.563                | 0.398                                    |
| U.S.            | 0.283                          | 0.841                | 0.452                                    |

RF+poly, rheumatoid factor positive polyarticular juvenile idiopathic arthritis. wGRS, weighted genetic risk score. sJIA, systemic juvenile idiopathic arthritis.

**Table S9. Reported associations ( $p < 1 \times 10^{-5}$ ) between suggestive sJIA susceptibility loci and other diseases.**

|                               | <b>Polygenic diseases</b>                                                                                                      | <b>Monogenic diseases</b>                               |
|-------------------------------|--------------------------------------------------------------------------------------------------------------------------------|---------------------------------------------------------|
| <b>COL11A1</b>                | <u>Primary angle closure glaucoma</u><br>Lumbar degenerative disc disease                                                      | Stickler syndrome<br>Skeletal dysplasia                 |
| <b>HDAC9</b>                  | <u>Stroke</u><br><u>Coronary artery disease</u><br>Peripheral artery disease<br>Ulcerative colitis<br>Non-diabetic retinopathy |                                                         |
| <b>LOC101929446</b>           | Obsessive-compulsive disorder<br>Inflammatory skin disease<br>Amyotrophic lateral sclerosis                                    |                                                         |
| <b>PRICKLE2</b>               | <u>Type 2 diabetes</u><br>Coronary artery calcification                                                                        |                                                         |
| <b>ZNF521</b>                 | Schizophrenia<br>Periodontitis                                                                                                 |                                                         |
| <b>EIF3H</b>                  | <u>Colorectal cancer</u><br><u>Ossification of posterior longitudinal ligament of spine</u>                                    |                                                         |
| <b>WWOX</b>                   | Type 2 diabetes                                                                                                                | Spinocerebellar atrophy<br>Infantile epileptic epilepsy |
| <b>LOC101928737 / JPH3</b>    | Schizophrenia<br>Major depressive disorder<br>Bipolar disorder<br>Alzheimer's disease                                          |                                                         |
| <b>LOC101927573 / SORCS1</b>  | Endometriosis<br>Prion disease                                                                                                 |                                                         |
| <b>TRIM58</b>                 | Spontaneous pituitary adenoma                                                                                                  |                                                         |
| <b>LOC101928516 / COL12A1</b> |                                                                                                                                | Congenital myopathy                                     |
| <b>LOC257396 / MOCS2</b>      | <u>Acne</u><br>Schizophrenia                                                                                                   | Molybdenum cofactor deficiency                          |
| <b>LDB2 / TAPT1 / ZEB2P1</b>  | Amyotrophic lateral sclerosis                                                                                                  | Syndromic osteochondrodysplasia                         |
| <b>RIN3 / LGMN</b>            | <u>Paget's disease</u><br><u>Chronic obstructive pulmonary disease</u><br><u>Alzheimer's disease</u>                           |                                                         |
| <b>MTHFSD / FOXL1 / FOXC2</b> |                                                                                                                                | Lymphedema-distichiasis                                 |

Underlined and italicized phenotypes have associations that exceed the threshold of genome-wide significance.



**A**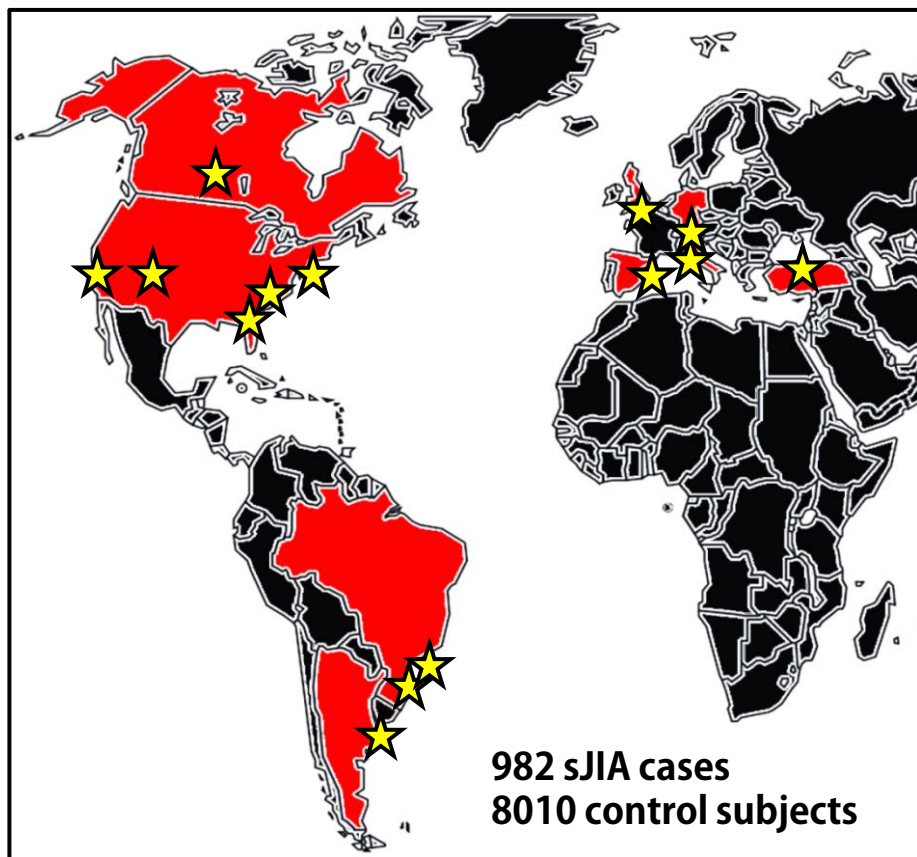**B**

17

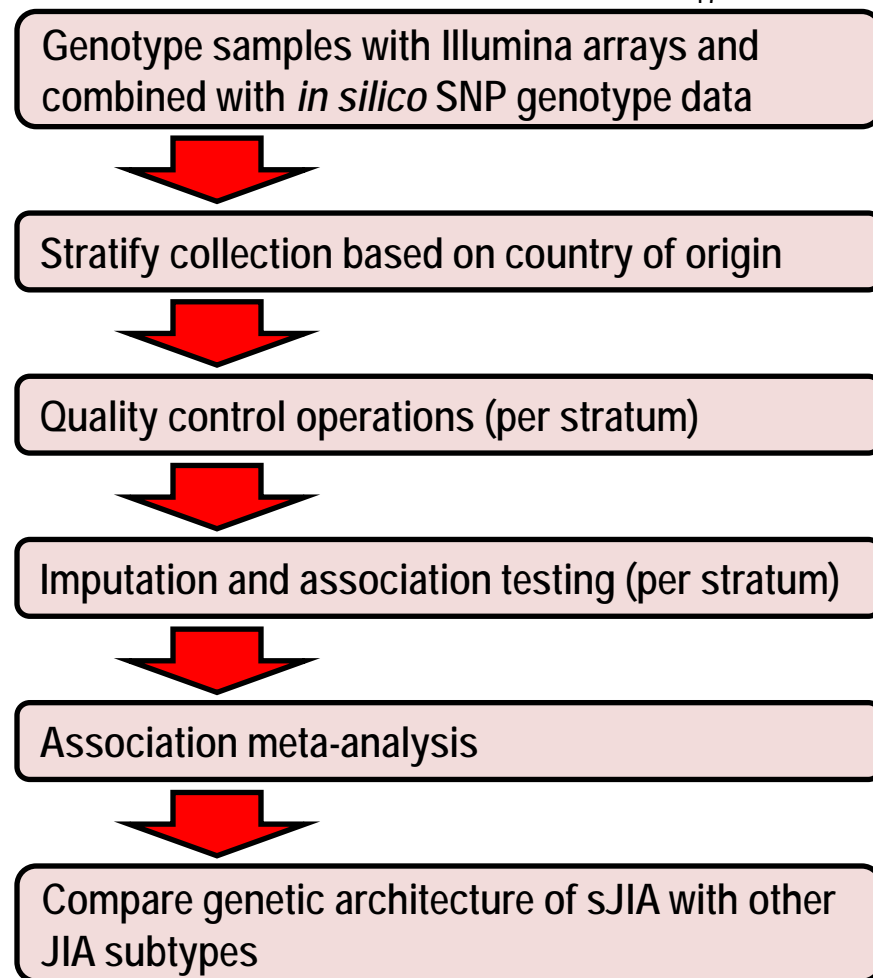

**Figure S1. Summary of study design implemented by genomewide association study of systemic juvenile idiopathic arthritis.** The International Childhood Arthritis Genetics Consortium GWAS of sJIA includes children from 14 referral centers (yellow stars) in 9 countries (red shading), as shown in **(A)**. The design of the study, which was stratified on the basis of geographic origin, is summarized in the flow chart in **(B)**.

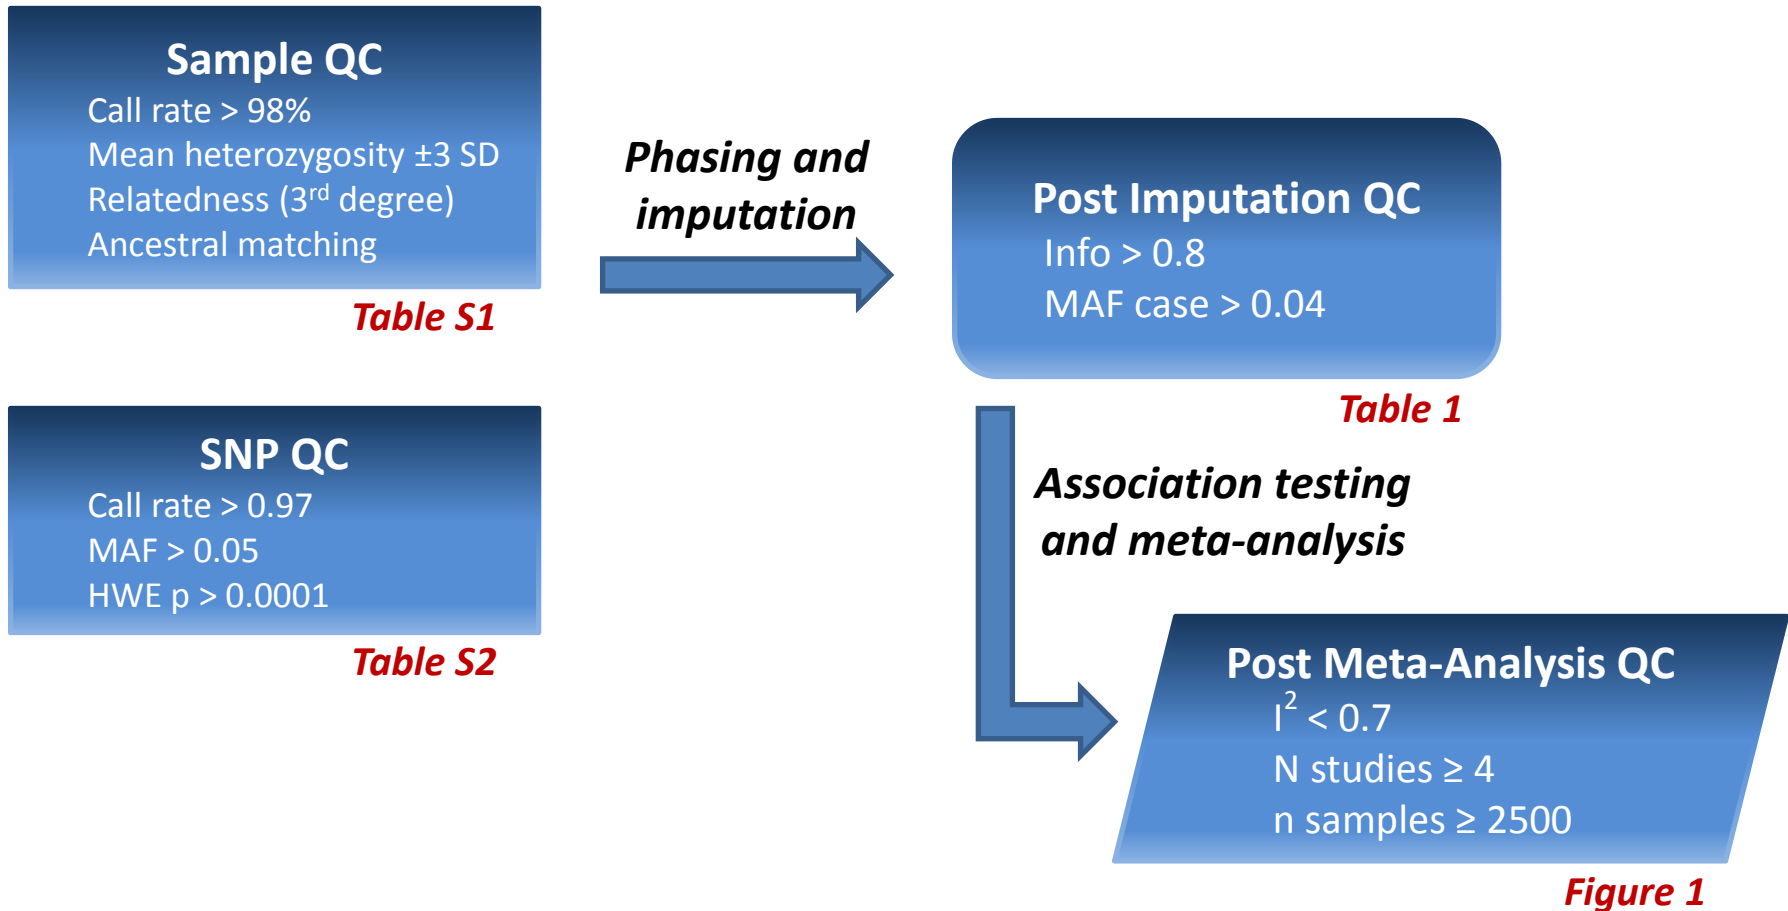

**Figure S2. Summary of Quality Control Operations.** Collections of directly genotyped sJIA cases and controls were combined with *in silico* SNP genotypes from additional control populations and were combined into 9 groups on the basis of geographic origin. Each collection was subjected to sample and SNP QC processes to produce 9 case-control strata. SNP imputation and association testing was performed separately in each population, and the genome-wide association results were meta-analyzed.

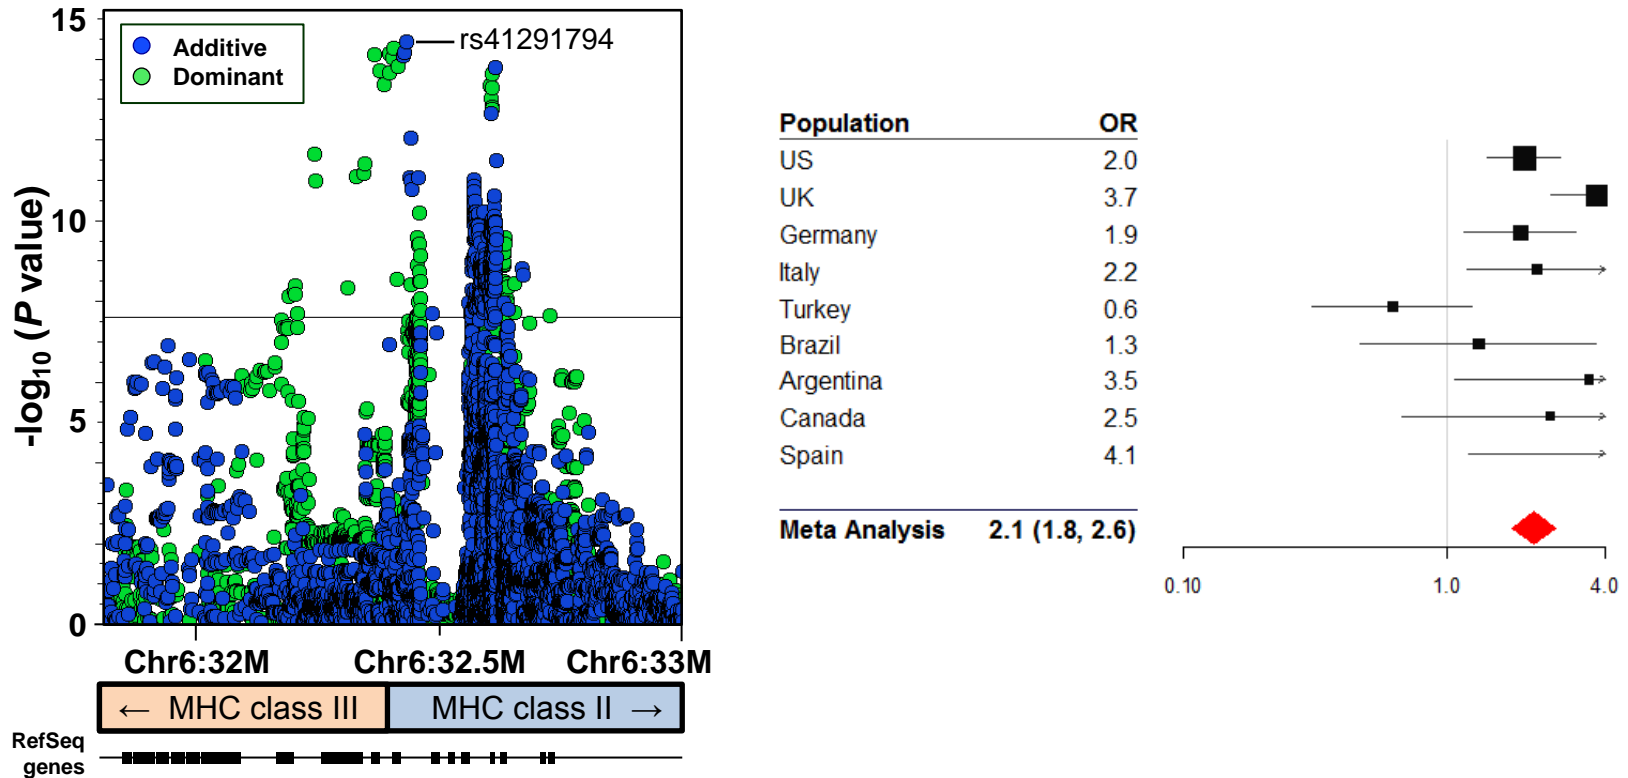

**Figure S3. MHC locus is the strongest sJIA susceptibility locus.** The regional association plot (A) of the MHC locus demonstrates a combination of additive (blue circles) and dominant (green circles) associations with sJIA. The threshold of genome-wide significance ( $p < 2.5 \times 10^{-8}$ ) is depicted by the horizontal black line. The forest plots display the effect of the peak SNP, rs41291794, on sJIA risk. MHC, major histocompatibility complex. OR, odds ratio. sJIA, systemic juvenile idiopathic arthritis. SNP, single nucleotide polymorphism.

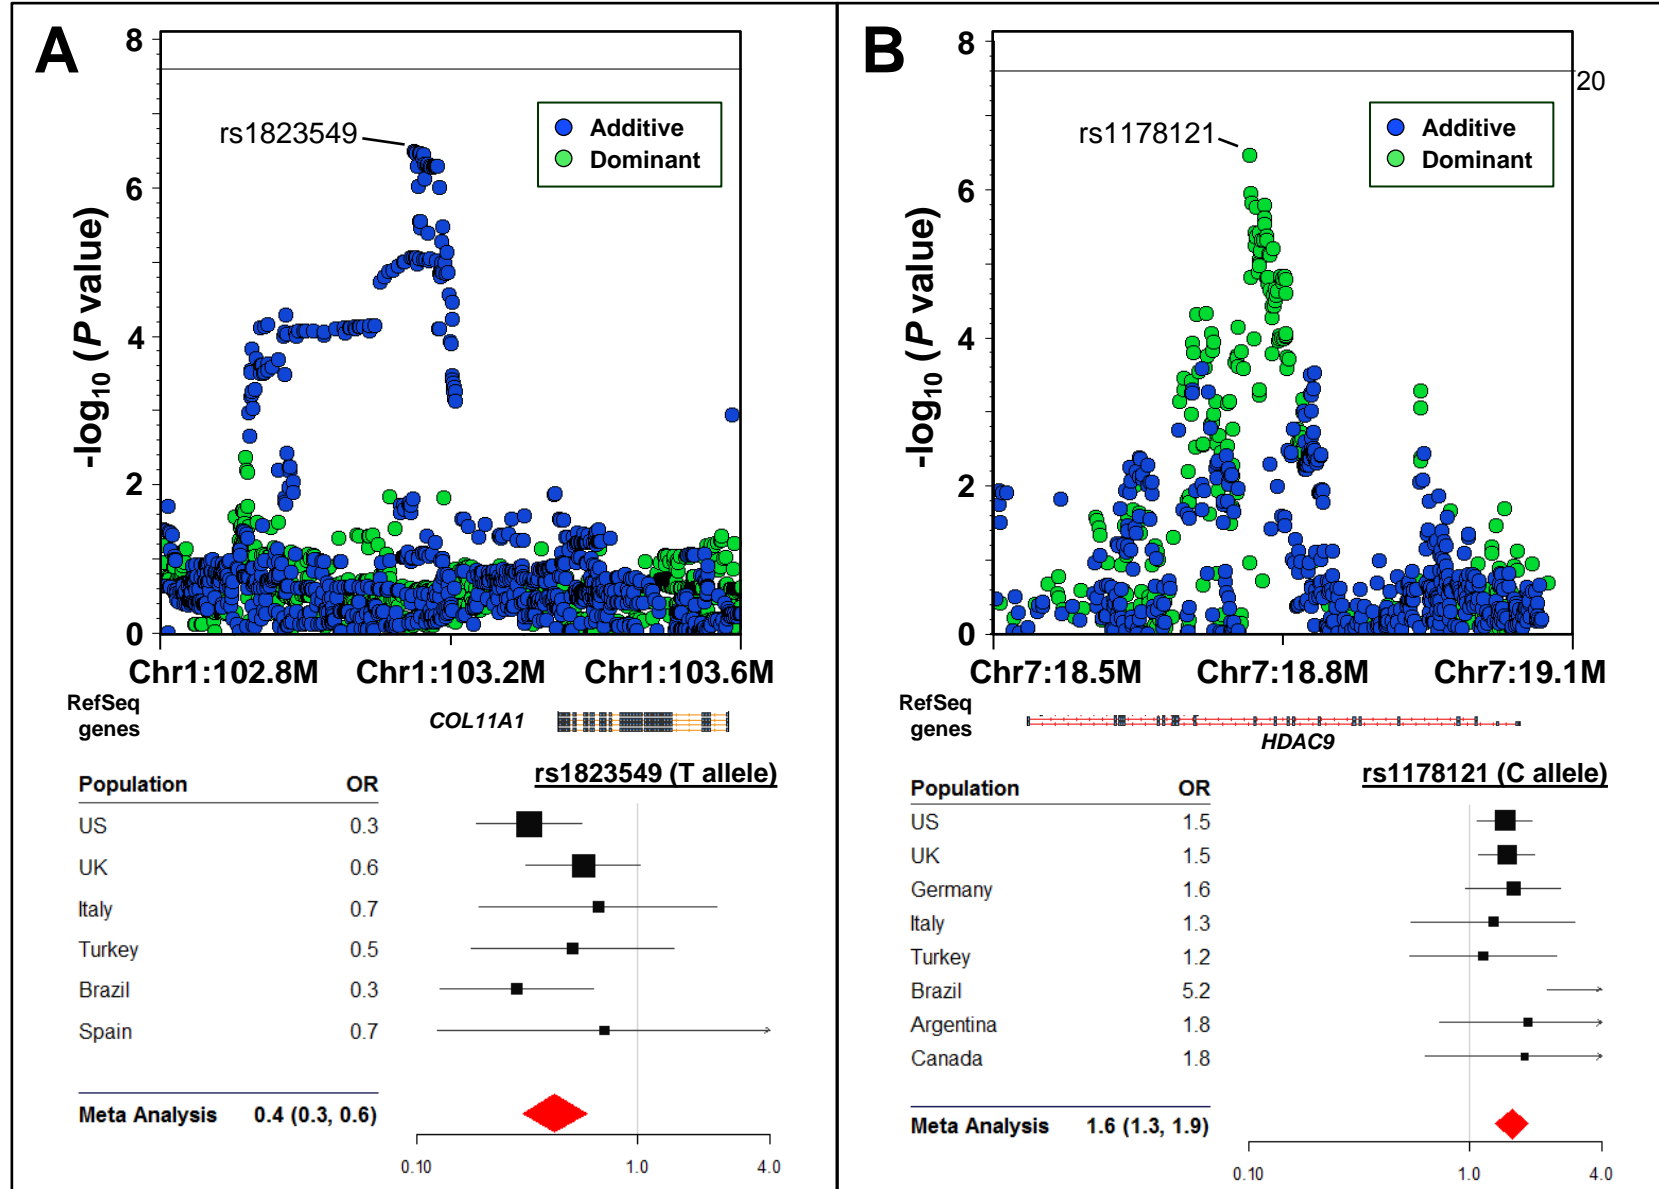

**Figure S4. Regional association and forest plots of loci highly suggestive of association with sJIA.** Regional association plots for susceptibility loci nearest to *COL11A1* (A) and *HDAC9* (B) demonstrate a combination of additive (blue circles) and dominant (green circles) associations with sJIA. The threshold of genome-wide significance ( $p < 2.5 \times 10^{-8}$ ) is depicted by the horizontal black line. Forest plots display the effect of the peak SNP from each susceptibility locus in the study populations. OR, odds ratio. sJIA, systemic juvenile idiopathic arthritis. SNP, single nucleotide polymorphism.

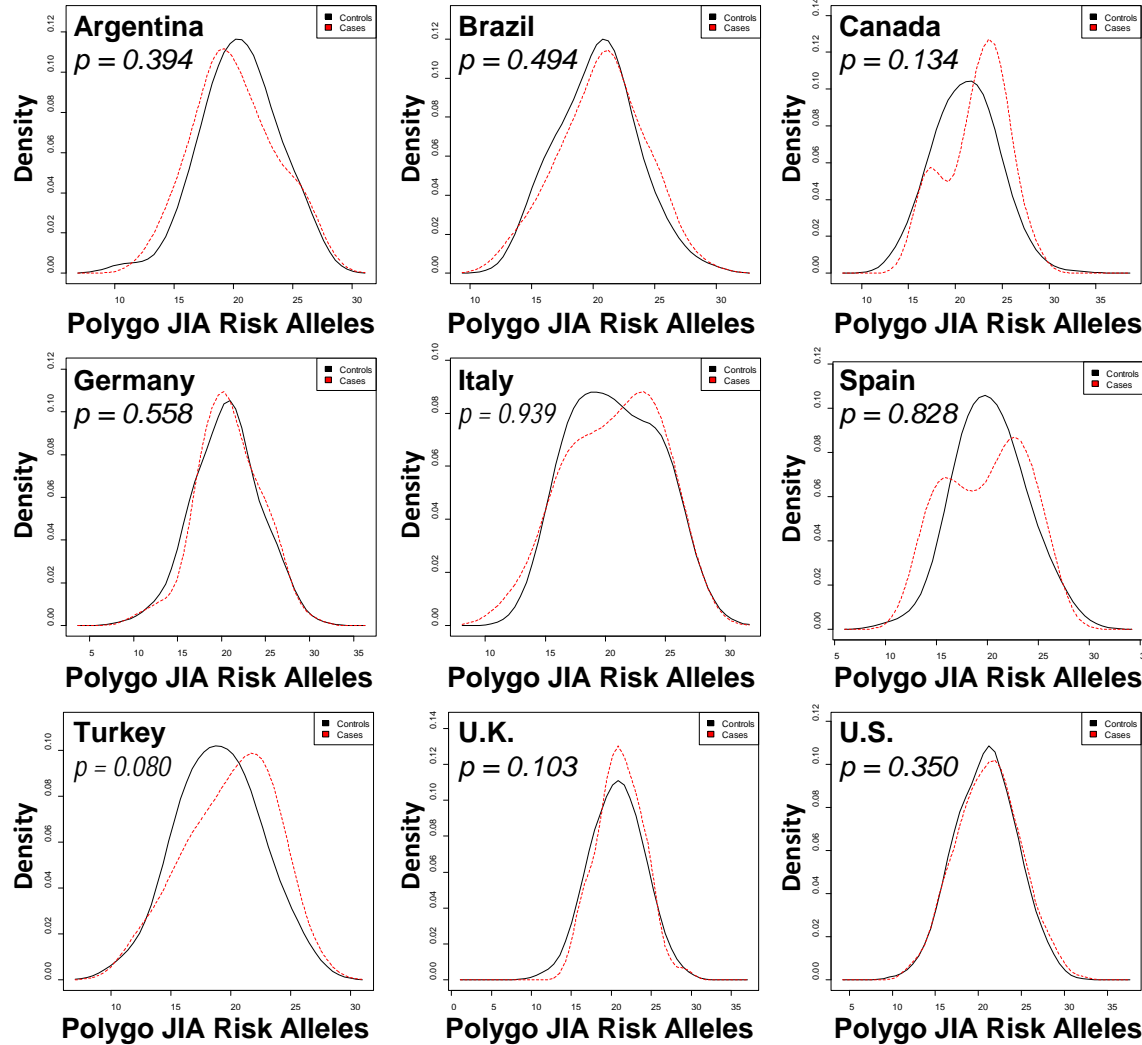**B**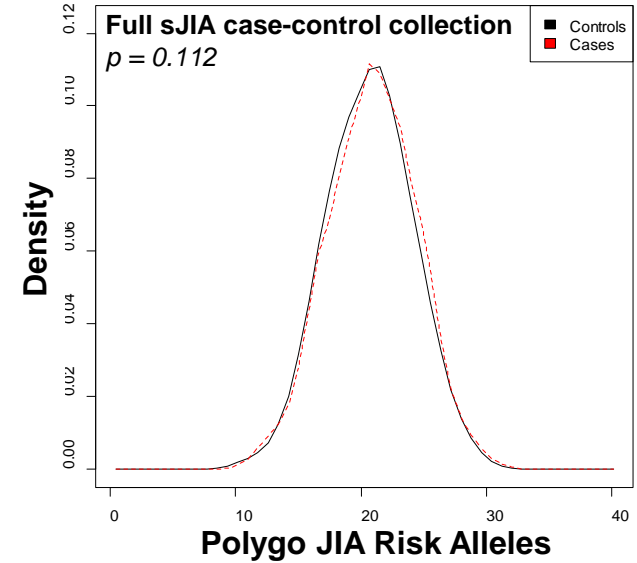

**Figure S5. Polygo JIA risk allele counts in sJIA case-control collections.** Kernel density plots display the distributions of polygo JIA risk allele counts in 9 sJIA case-control populations (**A**) and in the case-control collection (**B**). P values were calculated with the Wilcoxon Rank Sum test.

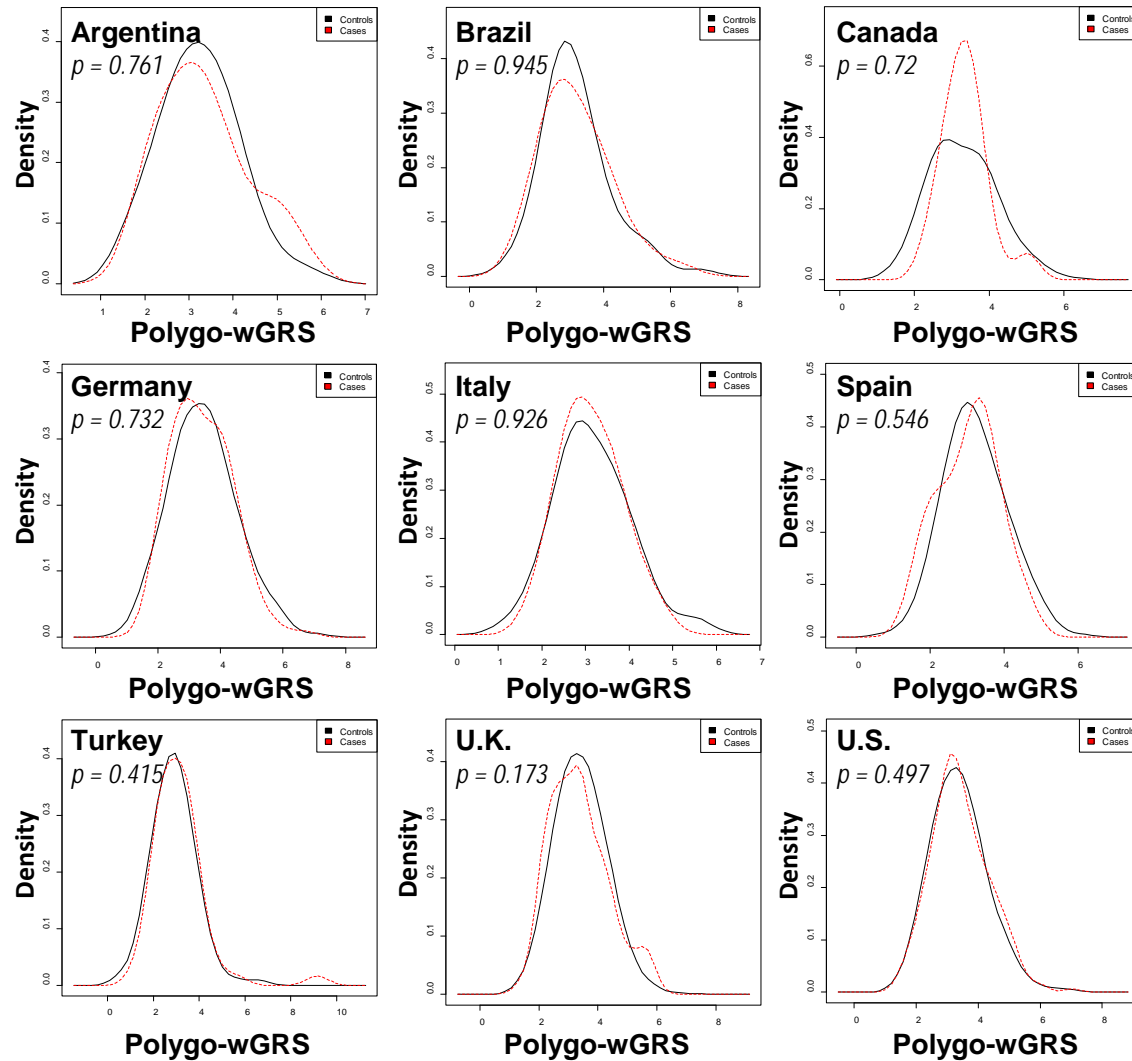

**Figure S6. Polygo JIA weighted genetic risk scores (polygo-wGRS) in sJIA case-control collections.** Kernel density plots display the distributions of polygo-wGRS in the 9 sJIA case-control populations. P values were calculated with the Wilcoxon Rank Sum test.

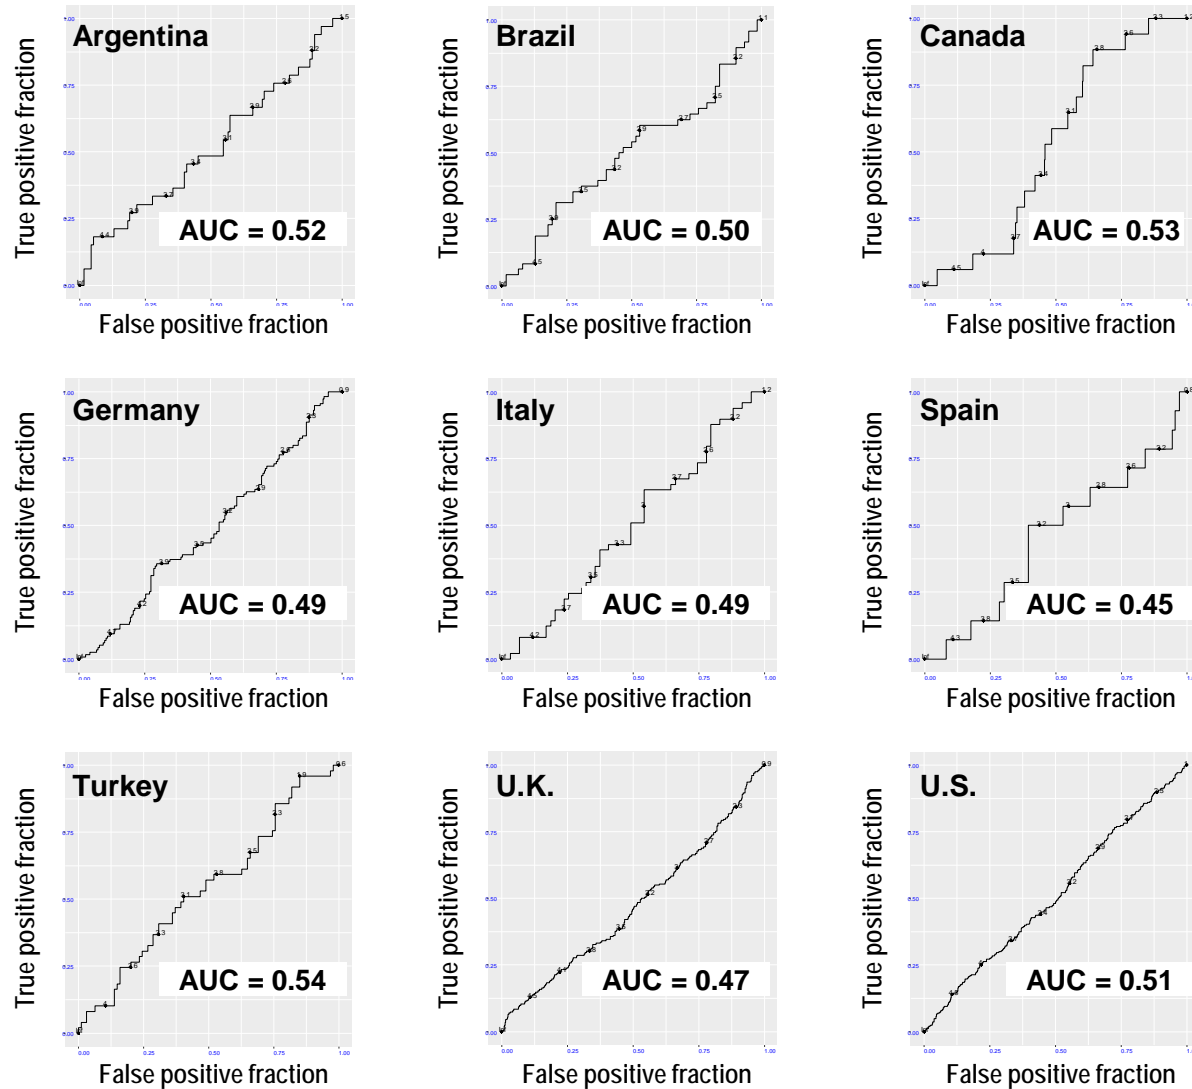

**Figure S7. Predictive value of polygo JIA weighted genetic risk score (polygo-wGRS) in sJIA case-control collections.** Receiver operator characteristic (ROC) curves with area under the curve (AUC) calculations demonstrate the performance of polygo-wGRS at predicting sJIA status in 9 sJIA case-control collections.

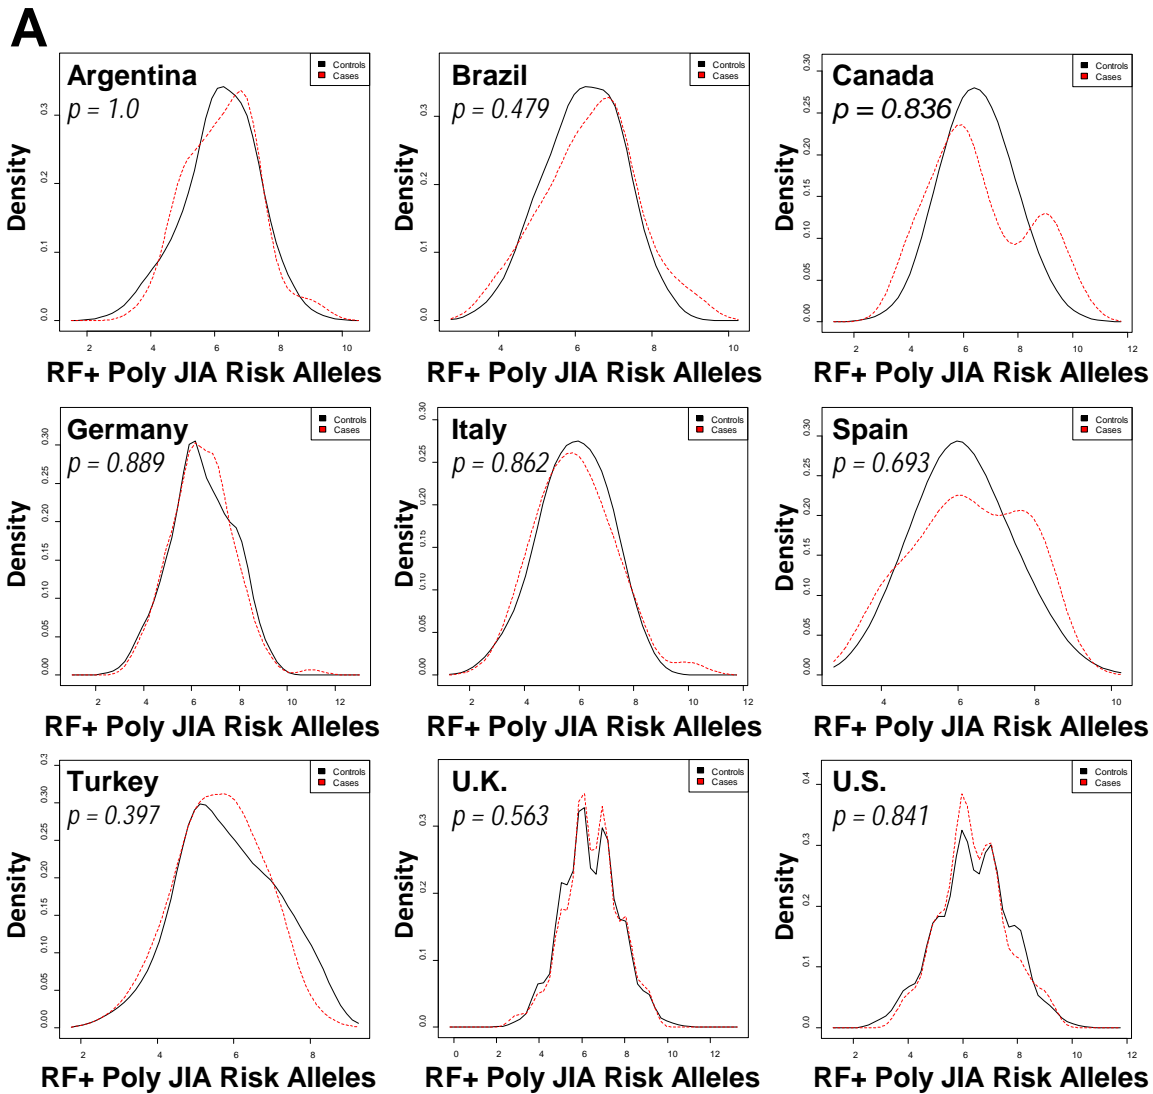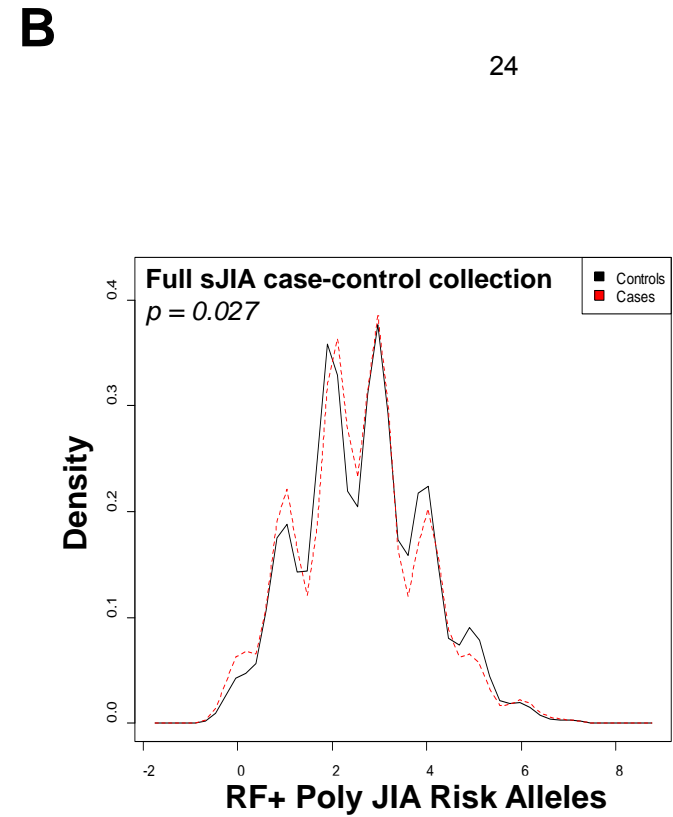

**Figure S8. RF+ poly JIA risk allele counts in sJIA case-control collections.** Kernel density plots display the distributions of RF+poly JIA risk allele counts in 9 sJIA case-control populations (**A**) and in the full case-control collection (**B**). P values were calculated with the Wilcoxon Rank Sum test.



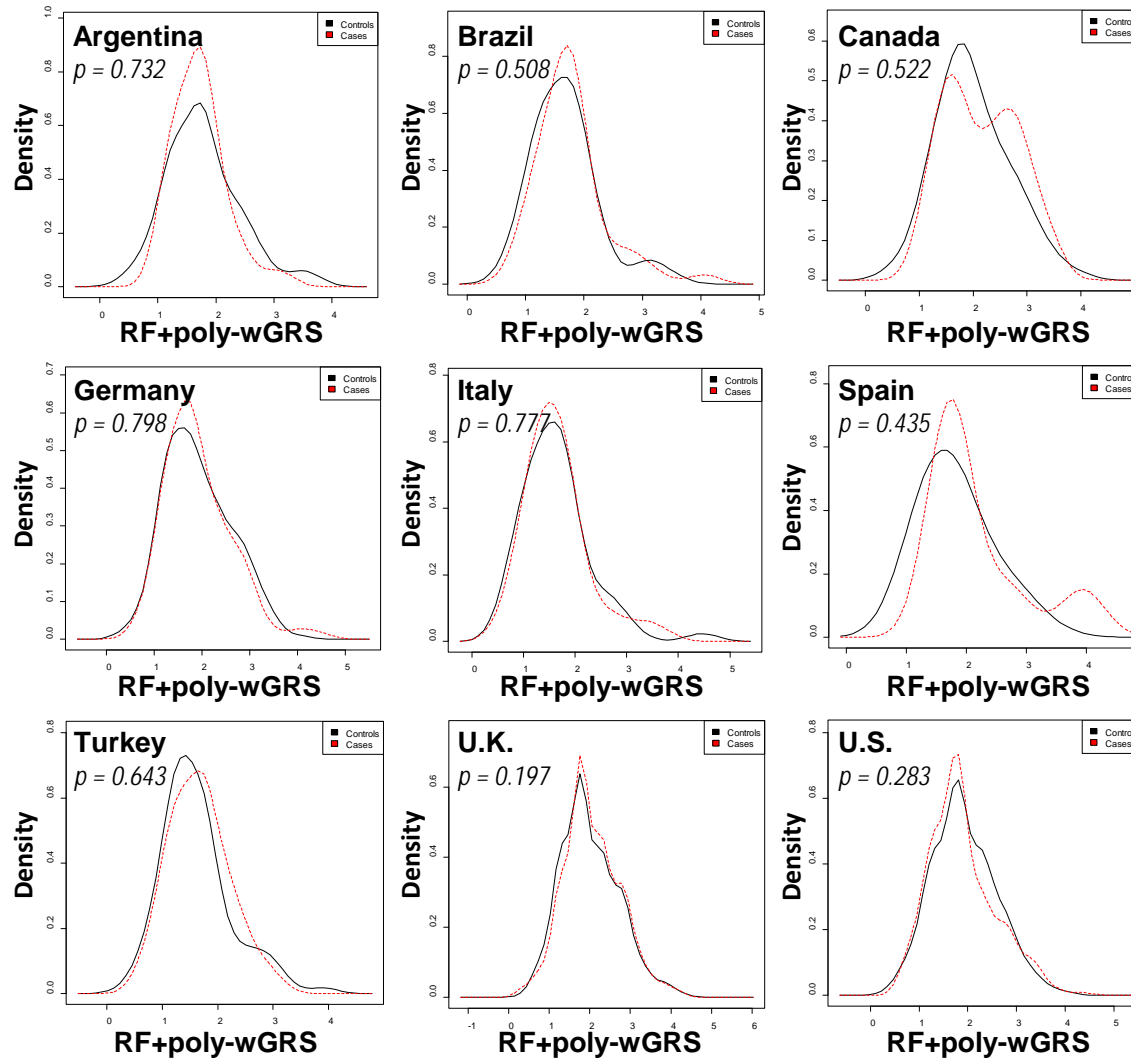

**Figure S9. RF+ poly JIA weighted genetic risk scores (RF+poly-wGRS) in sJIA case-control collections.** Kernel density plots display the distributions of RF+poly-wGRS in the 9 sJIA case-control populations. P values were calculated with the Wilcoxon Rank Sum test.

**A**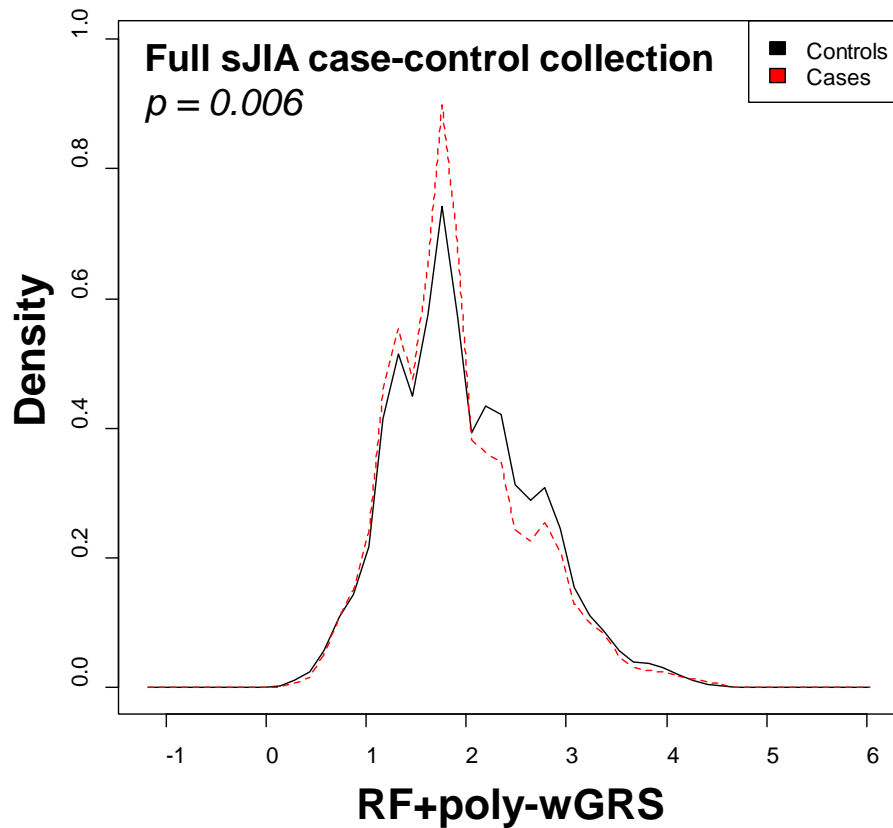**B**

26

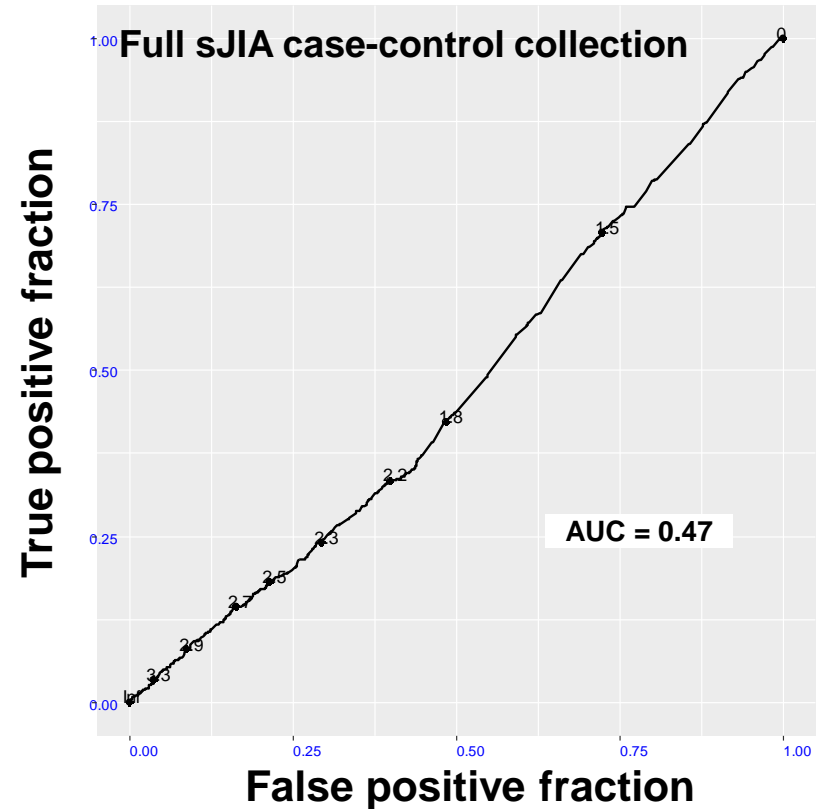

**Figure S10. Examination of RF+ poly JIA weighted genetic risk score (RF+poly-wGRS) in full sJIA collection.** Kernel density plot displays the distribution of RF+poly-wGRS in the full sJIA case-control collection (**A**). P-value was calculated with the Wilcoxon Rank Sum test. In **Panel B**, receiver operator characteristic (ROC) curve with area under the curve (AUC) calculation demonstrates the performance of RF+poly-wGRS at predicting sJIA status in the full case-control collection.

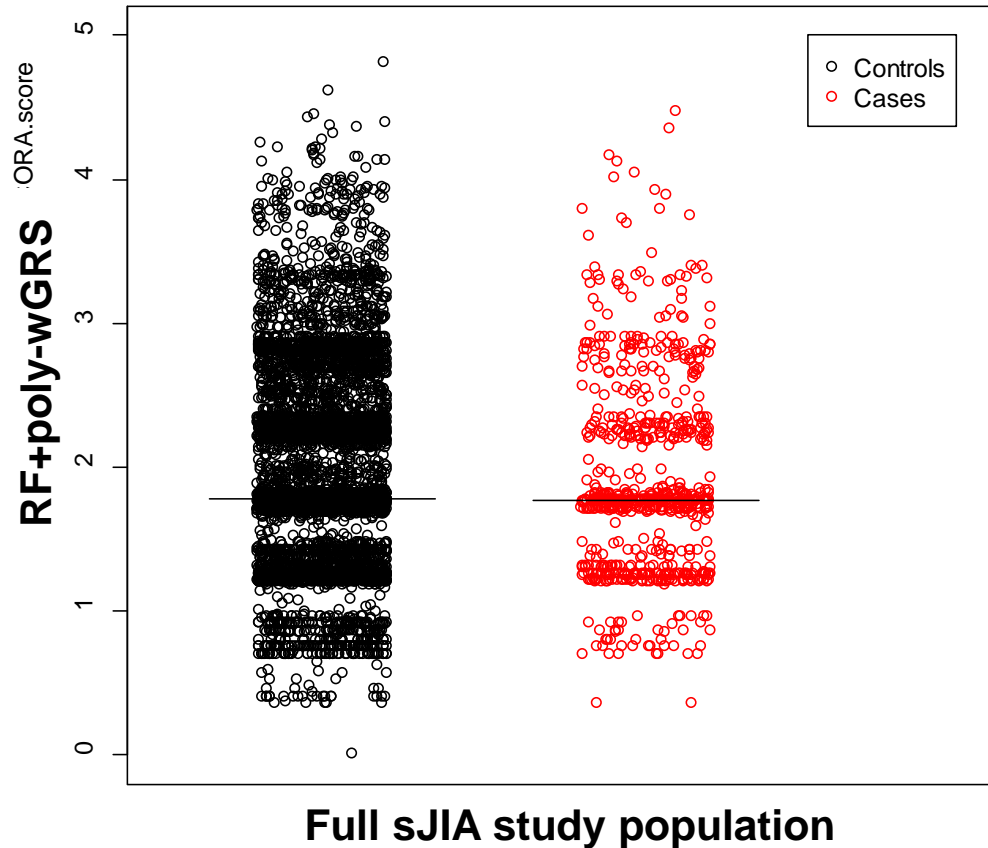

|                  | Median | Mean |
|------------------|--------|------|
| sJIA cases       | 1.77   | 1.91 |
| Healthy controls | 1.78   | 1.97 |

**Figure S11. Scatter plot of RF+ poly JIA weighted genetic risk scores (RF+poly-wGRS) in sJIA cases and controls from the full study collection.** Histograms demonstrate the distributions of RF+poly-wGRS in sJIA cases (red) and controls (black) from the full study collection. The horizontal lines represent the median values from each group, and the median and mean values are shown in the table to the right..

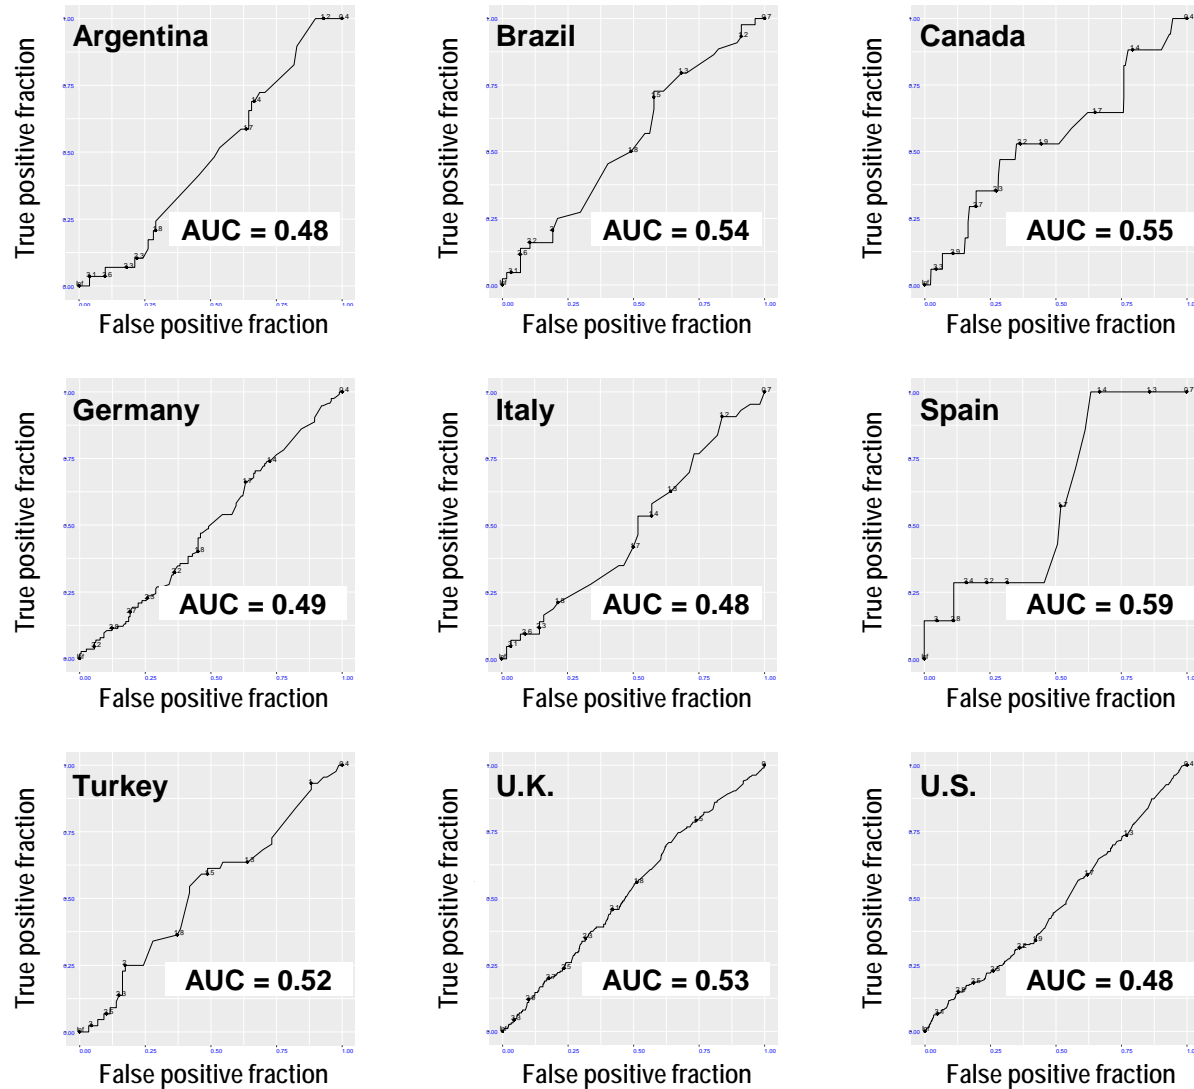

**Figure S12. Predictive value of RF+ poly JIA weighted genetic risk score (RF+poly-wGRS) in sJIA collections.** Receiver operator characteristic (ROC) curves with area under the curve (AUC) calculations demonstrate the performance of RF+poly-wGRS at predicting sJIA status in 9 sJIA case-control collections.
